# Supplementary material
Source: PubMed Central journal article supplement (PMC9837206)
Supplement: mmc1.pdf [file mmc1.pdf]

# Table of Contents:

- ◇ **Figure S1:** Global distribution of included trials (n = 388) p.2
- ◇ **Table S1:** Primary outcomes organized by outcome domains based on COMET database of core outcome sets p.3
- ◇ **Table S2:** Intervention combinations under investigation for PACS with their target organ system (n = 39) p.20
- ◇ **Table S3-S9:** PACS interventions organized according to the organ system targeted
  - Table S3: Cardiovascular System p.21
  - Table S4: Pulmonary System p.23
  - Table S5: Nervous System p.29
  - Table S6: Gastrointestinal System p.35
  - Table S7 Mental Health p.36
  - Table S8: Musculoskeletal System p.39
  - Table S9: Non-system Specific p.41

Figure S1

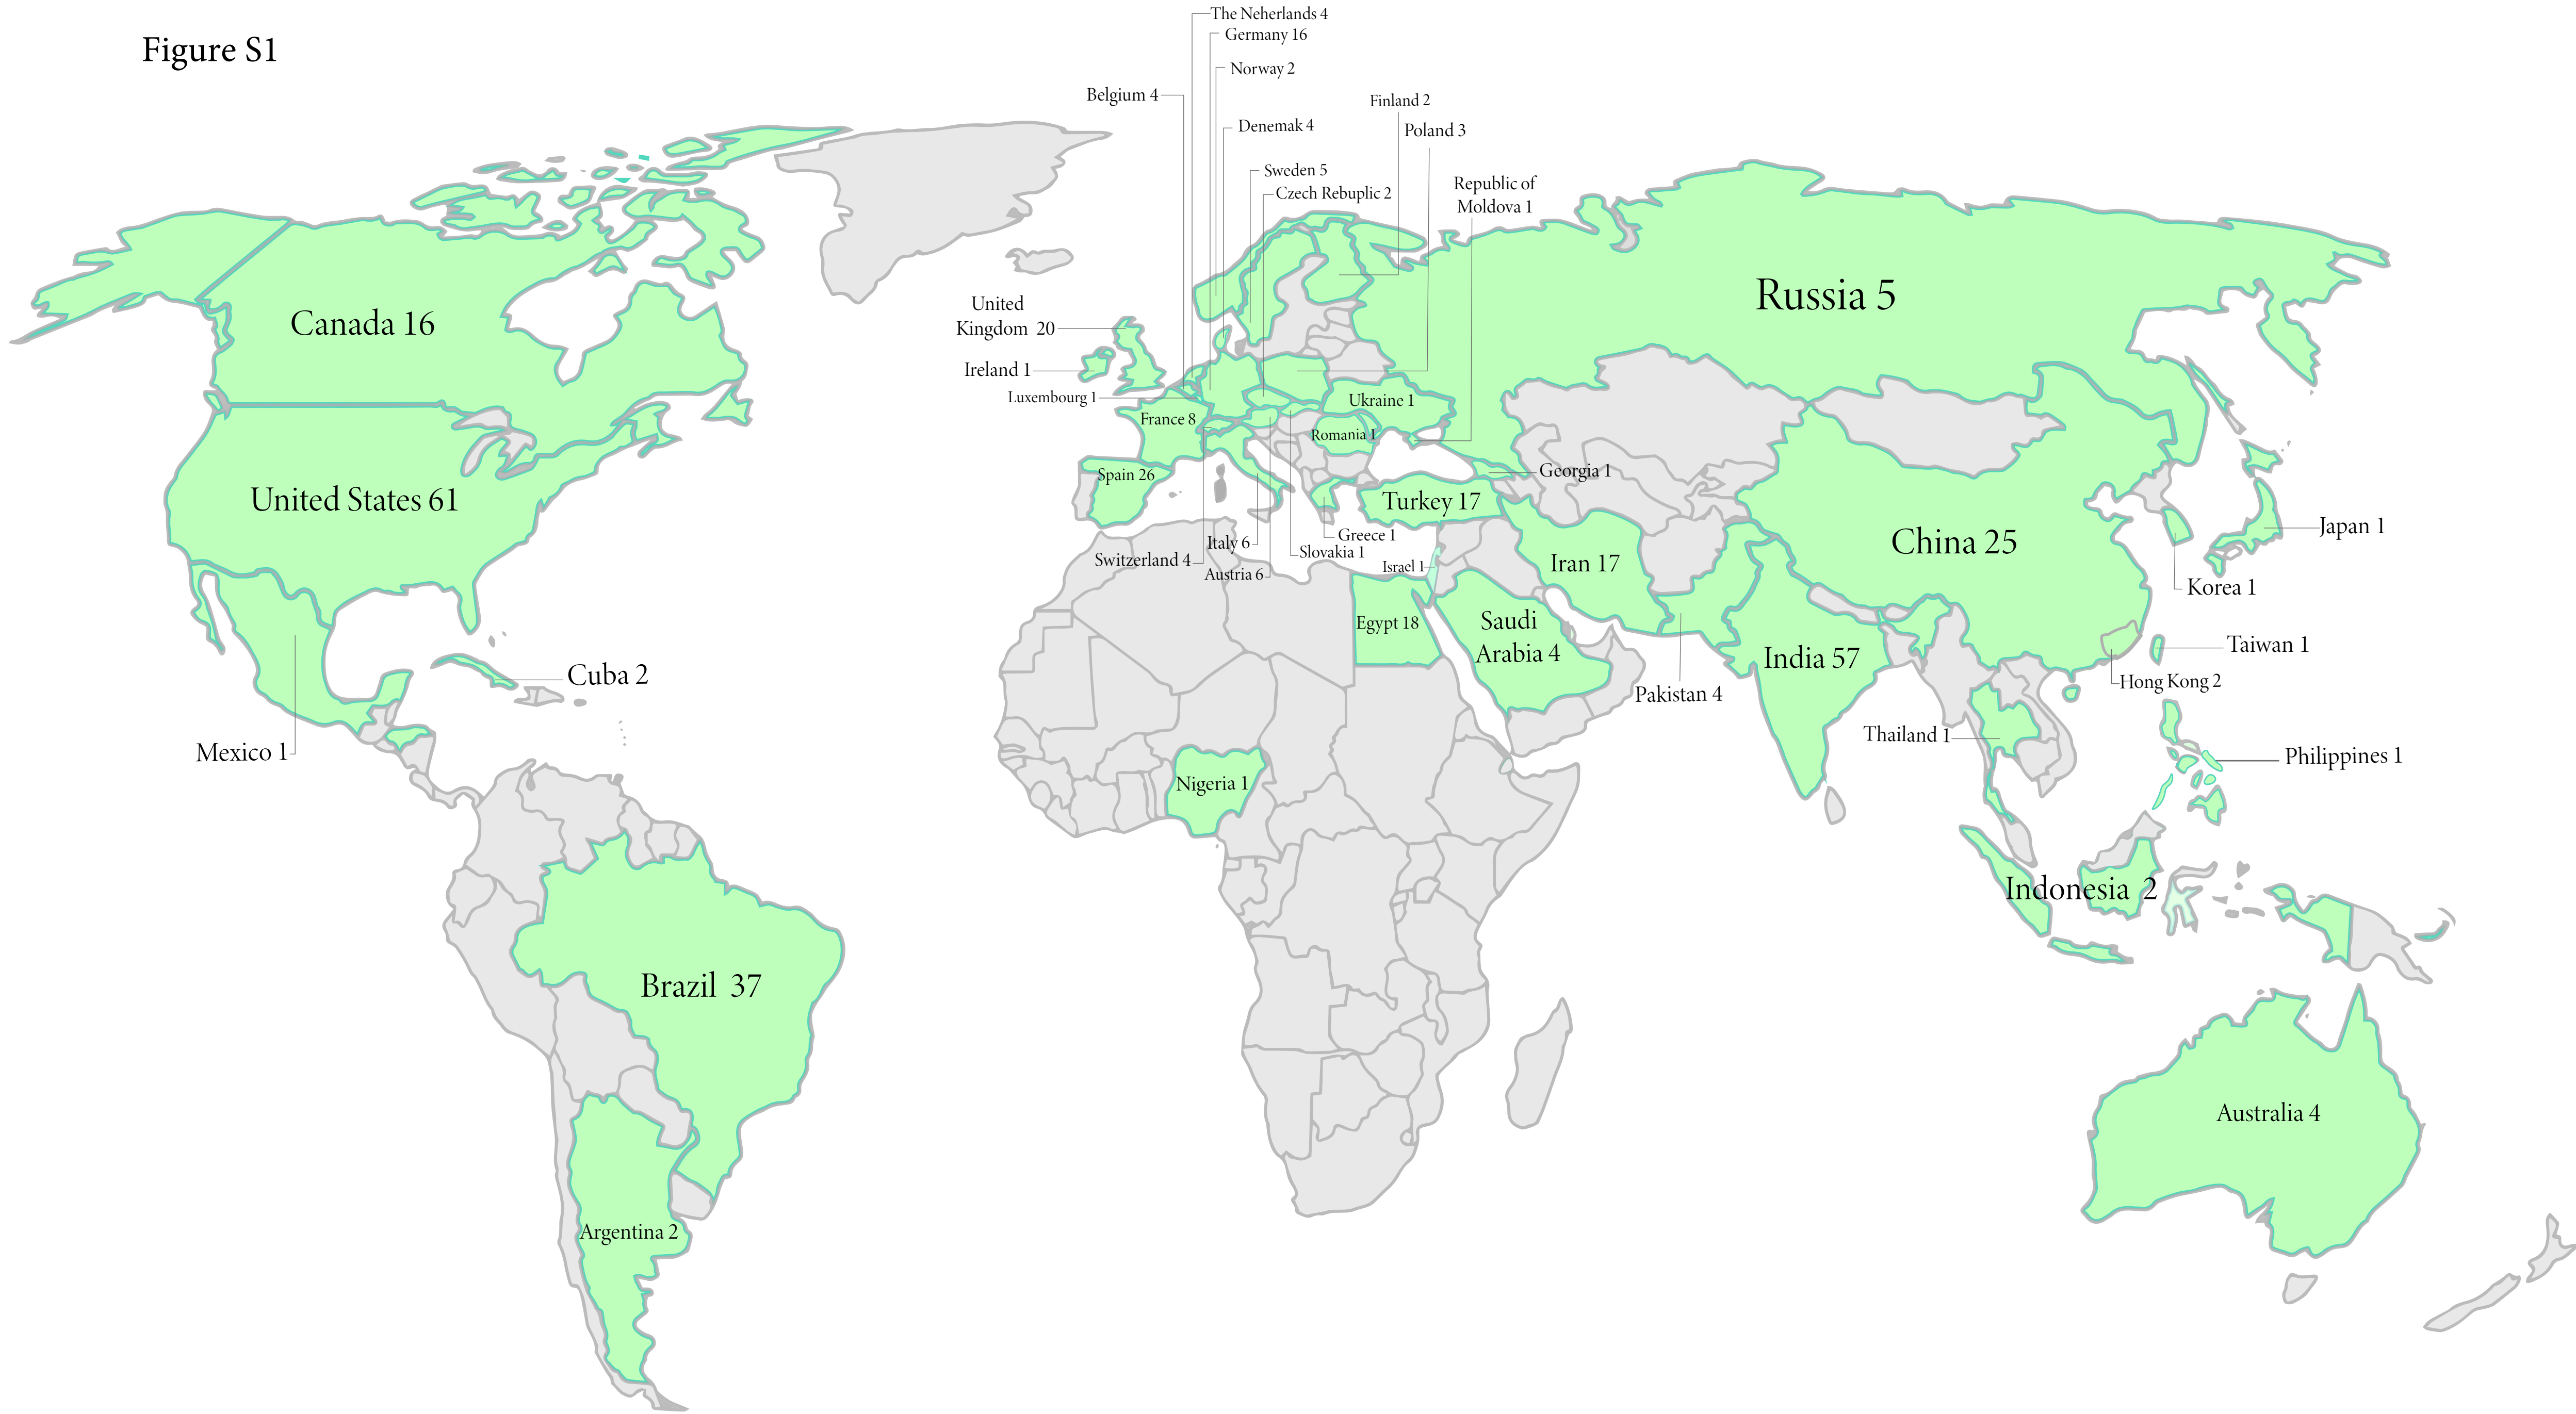

Table S1

| Primary outcome                                                                       | Total number of outcomes |
|---------------------------------------------------------------------------------------|--------------------------|
| <b>Mortality/survival</b>                                                             |                          |
| Mortality/survival                                                                    | 3                        |
| <b>Physiological/clinical</b>                                                         |                          |
| <b>Blood and lymphatic system outcomes</b>                                            |                          |
| Blood routine test                                                                    | 7                        |
| High sensitivity CRP (hs-CRP) or CRP                                                  | 5                        |
| Reduction in oxidative stress                                                         | 4                        |
| Coagulation outcomes                                                                  | 3                        |
| Complete metabolic panel                                                              | 2                        |
| ESR                                                                                   | 2                        |
| Damaged platelet mitochondrial bioenergetics                                          | 1                        |
| Endogenous concentration of CoQ10-TOTAL<br>(ubiquinone + ubiquinol) in platelets      | 1                        |
| Lipid profile                                                                         | 1                        |
| Vitamin D <sub>3</sub> level                                                          | 1                        |
| Vitamin K <sub>2</sub> level                                                          | 1                        |
| <b>Cardiac outcomes</b>                                                               |                          |
| Cardiopulmonary exercise test (CPET)/peak<br>oxygen consumption (VO <sub>2max</sub> ) | 20                       |
| Heart rate variability during physical tests                                          | 5                        |
| Echocardiography                                                                      | 2                        |
| Change in adjusted heart rate reserve                                                 | 1                        |
| Change in cardiorespiratory fitness                                                   | 1                        |

|                                                                                   |   |
|-----------------------------------------------------------------------------------|---|
| Change in palpitations                                                            | 1 |
| Change in pulse rate                                                              | 1 |
| Change in standing heart rate                                                     | 1 |
| Change in valvulo-arterial impedance (Zva)                                        | 1 |
| Exercise stress testing                                                           | 1 |
| High sensitivity Troponin T                                                       | 1 |
| Magnetic resonance imaging for left ventricular mass and right ventricular volume | 1 |
| Orthostatic stress test                                                           | 1 |
| Soluble ST2                                                                       | 1 |
| <b>Endocrine outcomes</b>                                                         |   |
| Hair cortisol                                                                     | 1 |
| Plasma level of cortisol                                                          | 1 |
| Plasma level of FGF-21                                                            | 1 |
| Plasma level of follistatin                                                       | 1 |
| Plasma level of irisin                                                            | 1 |
| <b>Gastrointestinal outcomes</b>                                                  |   |
| Change in abdominal distention                                                    | 1 |
| Change in loose stools                                                            | 1 |
| Change in zonulin levels over time                                                | 1 |
| Gastrointestinal Symptoms Rating Scale (GSRS)                                     | 1 |
| Intestinal fatty acid binding protein (iFABP)                                     | 1 |

|                                                                                                       |    |
|-------------------------------------------------------------------------------------------------------|----|
| Microbiome composition by sRNA sequencing                                                             | 1  |
| Patient Assessment of Constipation-Symptoms questionnaire (PAC-SYM)                                   | 1  |
| <b>General outcomes</b>                                                                               |    |
| Changes in Symptoms of PACS                                                                           | 24 |
| Fatigue Severity Scale (FSS)                                                                          | 16 |
| Chalder Fatigue Scale (CFQ-11)                                                                        | 9  |
| Fatigue Assessment Scale (FAS)                                                                        | 8  |
| Visual Analog Scale (VAS)                                                                             | 7  |
| Reduction of fatigue                                                                                  | 6  |
| COVID-19 Severity of Symptoms Questionnaire                                                           | 5  |
| Fat and lean body mass as measured by Dual Energy X-ray Absorptiometry (DEXA)                         | 4  |
| PROMIS Fatigue SF-7a (Patient-Reported Outcomes Measurement Information System Fatigue Short Form 7a) | 4  |
| Fatigue Questionnaire (FQ)                                                                            | 3  |
| Muscle fatigue assessment                                                                             | 3  |
| Vital signs                                                                                           | 3  |
| Changes in weight                                                                                     | 2  |
| DePaul Symptom Questionnaire-Post-Exertional Malaise (DSQ-PEM)                                        | 2  |
| Mean pain score using the diary Numeric Rating Scale (NRS)                                            | 2  |
| Modified COVID-19 Yorkshire Rehabilitation Scale                                                      | 2  |

|                                                                                  |   |
|----------------------------------------------------------------------------------|---|
| Physical examination                                                             | 2 |
| Somatic Symptom Severity (SSS-8)                                                 | 2 |
| Total Symptom Score (TSS)                                                        | 2 |
| Activity metabolic equivalent of task (MET)                                      | 1 |
| Analog algometer for pressure pain threshold                                     | 1 |
| Asthenia scale                                                                   | 1 |
| Brief Pain Inventory                                                             | 1 |
| Cardiorespiratory morbidity & inflammation                                       | 1 |
| Change in body temperature                                                       | 1 |
| Change in chest tightness                                                        | 1 |
| Chronic Fatigue Syndrome Questionnaire                                           | 1 |
| Clinical status assessment by using 7-category ordinal scale                     | 1 |
| Edmonton Symptom Assessment System (ESAS)                                        | 1 |
| Fatigue assessment by Checklist Individual Strength (CIS)                        | 1 |
| Fatigue index                                                                    | 1 |
| Frequency of disease relapse                                                     | 1 |
| Functional Assessment of Chronic Illness Therapy - Fatigue Scale (FACIT-Fatigue) | 1 |
| Hyperhidrosis                                                                    | 1 |
| McGill Pain Scale short form (SFMPQ)                                             | 1 |
| Modified Fatigue Impact Scale (MFIS)                                             | 1 |

|                                                                                                |   |
|------------------------------------------------------------------------------------------------|---|
| Modified Fatigue Impact Scale (MFIS)                                                           | 1 |
| Multidimensional Assessment Fatigue                                                            | 1 |
| Multidimensional Fatigue Inventory (MFI)                                                       | 1 |
| Nottingham Health Profile                                                                      | 1 |
| P4 Numeric Pain Rating Scale                                                                   | 1 |
| Pain Assessment by McGill-Melzack Pain Questionnaire                                           | 1 |
| Post-Exertional Malaise (PEM) questionnaire                                                    | 1 |
| Short form of the McGill Pain Questionnaire (SF-MPQ)                                           | 1 |
| Subject and Investigator Assessment Long COVID Questionnaire                                   | 1 |
| <b>Immune system outcomes</b>                                                                  |   |
| IL-6                                                                                           | 6 |
| Neutrophil function (burst function, phagocytosis, surface receptor expression, NET formation) | 4 |
| IL-10                                                                                          | 3 |
| Monocyte function (burst function, phagocytosis, surface receptor expression)                  | 3 |
| TNF-alpha                                                                                      | 3 |
| Flow cytometry for CD3 & CD4 T cells                                                           | 2 |
| IL-8                                                                                           | 2 |
| Immunoglobulins Quantitative (IgA, IgE, IgG, IgM)                                              | 2 |
| B-cell immunophenotyping                                                                       | 1 |
| Complement Panel (C4, C1-inhibitor, C1-inhibitor Function)                                     | 1 |

|                                                                            |   |
|----------------------------------------------------------------------------|---|
| GAD-65                                                                     | 1 |
| IL-17                                                                      | 1 |
| IL-1b                                                                      | 1 |
| IL-23                                                                      | 1 |
| IL-4                                                                       | 1 |
| IL-6 receptor                                                              | 1 |
| Soluble CD14                                                               | 1 |
| s-TNF-RII                                                                  | 1 |
| T-cell Immunophenotyping                                                   | 1 |
| Th1/Th2 cytokine levels                                                    | 1 |
| Toll-like receptors function assay                                         | 1 |
| <b>Infection and infestation outcomes</b>                                  |   |
| Endotoxin level                                                            | 1 |
| <b>Metabolism and nutrition outcomes</b>                                   |   |
| Changes from Baseline in food intake on the four<br>24-hour dietary recall | 1 |
| Food Preference on the Leeds Food Preference<br>Questionnaire (LFPQ)       | 1 |
| <b>Musculoskeletal and connective tissue outcomes</b>                      |   |
| Handgrip strength dynamometer                                              | 8 |
| Quadriceps muscle endurance & peak load test                               | 3 |
| Ankle strength                                                             | 1 |



|                                                                                              |    |
|----------------------------------------------------------------------------------------------|----|
| Change in isokinetic muscle force                                                            | 1  |
| Chest press for upper body strength                                                          | 1  |
| Flexibility, sit-and-reach test, & single-leg stance test                                    | 1  |
| Gastrocnemius muscle endurance in response to electrical stimulation                         | 1  |
| Gastrocnemius muscle strength                                                                | 1  |
| Goniometer for cranio-vertebral angle measurement                                            | 1  |
| Lactic acid level                                                                            | 1  |
| Muscle thickness by ultrasound imaging                                                       | 1  |
| Phosphocreatine recovery rate following moderate exercise                                    | 1  |
| <b>Nervous system outcomes</b>                                                               |    |
| Sniffin' Sticks test                                                                         | 12 |
| Visual Analog Scale (VAS) for loss of smell                                                  | 7  |
| University of Pennsylvania Smell Identification Test (UPSIT)                                 | 5  |
| Short Version of the Questionnaire of Olfactory Disorders-Negative Statements (sQOD-NS)      | 3  |
| Mini-Balance Evaluation Systems Test (Mini-BESTest)                                          | 2  |
| National Health and Nutrition Examination Survey (NHNES) taste and smell questionnaire (CSQ) | 2  |
| Olfactory function test                                                                      | 2  |
| Smell identification test                                                                    | 2  |

|                                                                       |   |
|-----------------------------------------------------------------------|---|
| Tinnitus Handicap Inventory (THI)                                     | 2 |
| Visual Analog Scale (VAS) for headache                                | 2 |
| Assessment for self-reported olfactory function (ASOF)                | 1 |
| Botanical test score for smell                                        | 1 |
| Brain responses following smell stimulations                          | 1 |
| Brief Smell Identification Test (BSIT)                                | 1 |
| Change in electroencephalography P300 event related potential         | 1 |
| Changes in amplitude of long-interval intracortical inhibition (LICI) | 1 |
| Changes in concussion using King-Devick test                          | 1 |
| Clinical autonomic function                                           | 1 |
| Complete neurological exam                                            | 1 |
| Connecticut olfactory test (CCCRC)                                    | 1 |
| Dizziness Handicap Inventory (DHI)                                    | 1 |
| DyNaChron-olfaction questionnaire                                     | 1 |
| Headache diary                                                        | 1 |
| Headache disability index                                             | 1 |
| Headache Impact Scale (HIT)                                           | 1 |
| Iran Smell Identification Test (Iran-SIT)                             | 1 |
| Migraine Disability Assessment (MIDAS) questionnaire                  | 1 |
| Mini-Mental State Examination (MMSE)                                  | 1 |

|                                                          |   |
|----------------------------------------------------------|---|
| NeuroTrax test                                           | 1 |
| n-house test for chemosensory dysfunction (TMSC)         | 1 |
| ODORATEST score for anosmia                              | 1 |
| Resting-state functional connectivity (rsFC)             | 1 |
| Seizure Severity Questionnaire (SSQ)                     | 1 |
| Sniffin' Sticks Parosmia Test (SSParoT)                  | 1 |
| Taste assessment                                         | 1 |
| Tinetti Balance and Gait Analysis (TBGA)                 | 1 |
| Waterless Empirical Taste Test (WETT)                    | 1 |
| <b>Renal and urinary outcomes</b>                        |   |
| KDIGO functional classification of kidney damage         | 1 |
| Plasma level of albumin                                  | 1 |
| <b>Reproductive system and breast outcomes</b>           |   |
| International index of erectile function A & B           | 1 |
| Index of premature ejaculation                           | 1 |
| <b>Psychiatric outcomes</b>                              |   |
| Hospital Anxiety & Depression Scale (HADS) questionnaire | 5 |
| Pittsburg Sleep Quality Index                            | 5 |
| Beck Anxiety Scale                                       | 3 |
| Beck Depression Inventory II                             | 3 |
| Corona Disease Anxiety Scale (CDAS)                      | 2 |

|                                                                  |    |
|------------------------------------------------------------------|----|
| Hamilton Anxiety Rating Scale (HAM-A)                            | 2  |
| Kessler-10 Psychological Distress Scale (K10)                    | 2  |
| Anorexia assessment                                              | 1  |
| Hamilton Depression Rating Scale (HAM-D)                         | 1  |
| Insomnia Severity Index                                          | 1  |
| Montgomery-Åsberg Depression Rating Scale<br>(MADRS)             | 1  |
| Patient Health Questionnaire depression scale<br>(PHQ-8)         | 1  |
| Perceived stress scale (PSS)                                     | 1  |
| Posttraumatic Stress Disorder Checklist for DSM-5<br>(PCL-5)     | 1  |
| Quick Inventory of Depressive Symptomatology<br>(QIDS-SR)        | 1  |
| Self-rating anxiety scale (SAS)                                  | 1  |
| Self-rating depression scale (SDS)                               | 1  |
| State-Trait Anxiety Inventory (STAI)                             | 1  |
| State-Trait Anxiety Inventory (STAI-Y1)                          | 1  |
| Symptoms of Post-Traumatic Stress Disorder<br>(PTSD)             | 1  |
| The Depression, Anxiety and Stress Scale - 21<br>Items (DASS-21) | 1  |
| <b>Respiratory, thoracic, and mediastinal outcomes</b>           |    |
| Pulmonary function testing                                       | 43 |
| Modified Medical Research Council (mMRC)<br>dyspnea scale        | 10 |

|                                                                    |   |
|--------------------------------------------------------------------|---|
| Fibrosis in high resolution computed tomography (HRCT) of the lung | 9 |
| Inspiratory muscle strength or maximal inspiratory pressure (MIP)  | 9 |
| Borg Dyspnea Scale                                                 | 8 |
| Change in blood oxygenation (SpO2 saturation)                      | 8 |
| St. George's Respiratory Questionnaire (SGRQ)                      | 7 |
| Expiratory muscle strength or maximal expiratory pressure (MEP)    | 5 |
| Modified Borg Dyspnea Scale                                        | 5 |
| Respiratory improvement                                            | 5 |
| COPD Assessment Test (CAT)                                         | 4 |
| Medical Research Council (MRC) dyspnea score                       | 4 |
| Borg Rating of Perceived Exertion (RPE) scale                      | 3 |
| Cough severity index scale                                         | 2 |
| Alveolar-arterial oxygen gradient (A-a O2)                         | 1 |
| Arterial blood gas (ABG)                                           | 1 |
| Change in dry cough                                                | 1 |
| Chemoreflex function                                               | 1 |
| Dyspnoea Management Questionnaire (DMQ-30)                         | 1 |
| Multidimensional Dyspnea Profile (MDP)                             | 1 |
| Peak cough flow                                                    | 1 |
| Peak flow rate                                                     | 1 |

|                                                                                                          |    |
|----------------------------------------------------------------------------------------------------------|----|
| Radioaerosol pulmonary deposition                                                                        | 1  |
| Ratio of partial pressure of oxygen to fraction of inspired oxygen (PaO <sub>2</sub> /FiO <sub>2</sub> ) | 1  |
| Respiratory rate                                                                                         | 1  |
| The University of California, San Diego Shortness of Breath Questionnaire (SOBQ)                         | 1  |
| Visual analog scale (VAS) for cough severity                                                             | 1  |
| <b>Vascular outcomes</b>                                                                                 |    |
| Brachial artery flow mediated dilation (FMD)                                                             | 4  |
| Pulse wave velocity                                                                                      | 2  |
| Augmentation index by applanation tonometry                                                              | 1  |
| Cerebral Vascular Endothelial Function with Breath Hold Acceleration Index (BHAi)                        | 1  |
| Microvascular Function with passive leg movement                                                         | 1  |
| <b>Functioning</b>                                                                                       |    |
| <b>Physical functioning</b>                                                                              |    |
| 6-minute walk test (6MWT)                                                                                | 58 |
| Post-COVID-19 Functional Status (PCFS) scale                                                             | 12 |
| 30 Second Sit to Stand Test                                                                              | 6  |
| Change in exercise capacity (physical function)                                                          | 6  |
| 1-minute sit-to-stand (1-MSTS)                                                                           | 3  |
| Barthel Index of Activities of Daily Living                                                              | 3  |
| Cardiorespiratory fitness                                                                                | 2  |

|                                                                       |   |
|-----------------------------------------------------------------------|---|
| Incremental shuttle walk test                                         | 2 |
| Short Physical Performance Battery                                    | 2 |
| The International Physical Activity Questionnaires (IPAQ)             | 2 |
| WHO Disability Assessment Schedule (WHODAS 2.0)                       | 2 |
| 5-repetition chair sit and chair test (TSLC5)                         | 1 |
| 6-minute pegboard and ring test (6PBRT)                               | 1 |
| Activities of Daily Living Questionnaire (ADLQ)                       | 1 |
| Activity monitoring with ActiGraph GT3X                               | 1 |
| Adapted Illness Intrusiveness Rating (AIIR)                           | 1 |
| Canadian Occupational Performance Measure (COPM)                      | 1 |
| Exercise capacity by Balke treadmill protocol                         | 1 |
| Fall-risk by Biodex balance system                                    | 1 |
| International Physical Activity Questionnaire-short form (IPAQ-SF)    | 1 |
| Katz Index of Independence in Activities of Daily Living              | 1 |
| NIH Toolbox: Self-Efficacy (Ages 18+) - Item Bank/Fixed Form          | 1 |
| Oxford Participation and Activities Questionnaire (Ox-PAQ)            | 1 |
| The Lawton-Brody Instrumental Activities of Daily Living (iADL) scale | 1 |
| <b>Social functioning</b>                                             |   |
| Social support rate scale (SSRS)                                      | 1 |
| <b>Emotional functioning/well-being</b>                               |   |

|                                                                            |   |
|----------------------------------------------------------------------------|---|
| Brackets RULER (Recognize, Understand, Label, Express, and Regulate) Scale | 1 |
| Warwick-Edinburgh Mental Wellbeing Scale (WEMWBS)                          | 1 |
| WHO Wellbeing Index                                                        | 1 |
| <b>Cognitive functioning</b>                                               |   |
| Montreal Cognitive Assessment (MoCA)                                       | 3 |
| Neuropsychological Assessment Battery (NAB)                                | 3 |
| Change in subjective cognitive difficulties                                | 2 |
| Digit Span Task                                                            | 2 |
| Digit Symbol Substitution Test (DSST)                                      | 2 |
| Trail Making Test (TMT)                                                    | 2 |
| Addenbrooke's Cognitive Examination Revised (ACE-R) test                   | 1 |
| Behavior Rating Inventory of Executive Function - Adult Version (BRIEF-A)  | 1 |
| Boston Nomination Test (vocabulary test)                                   | 1 |
| Brief-COPE (Coping Orientation to Problems Experienced Inventory)          | 1 |
| California Verbal Learning Test (CVLT)                                     | 1 |
| Change in inhibitory control                                               | 1 |
| Change in processing speed                                                 | 1 |
| Clock Drawing Test (CDT)                                                   | 1 |
| Cognitive Function Self-Assessment Scale (CFSS)                            | 1 |
| Dimensional Change Card Sort Test (DCCS)                                   | 1 |



|                                                                            |   |
|----------------------------------------------------------------------------|---|
| Executive functioning and memory composite scores                          | 1 |
| Flanker Inhibitory Control and Attention Test (Flanker)                    | 1 |
| Frontal assessment battery (FAB)                                           | 1 |
| Life Orientation Test (LOT)                                                | 1 |
| List Sorting Working Memory Test                                           | 1 |
| Memory Failures of Everyday (MFE) questionnaire                            | 1 |
| N-back task for memory performance                                         | 1 |
| Pattern Comparison Processing Speed Test                                   | 1 |
| Performance on proprietary cognitive function software                     | 1 |
| Phonological verbal fluency task                                           | 1 |
| Picture Sequence Memory Test (PSMT)                                        | 1 |
| Psychological test involving concentration and attention                   | 1 |
| Repeatable Battery for the Assessment of Neuropsychological Status (RBANS) | 1 |
| Rey Auditory Verbal Learning Test (RAVLT)                                  | 1 |
| Selective attention/vigilance (computer test)                              | 1 |
| Semantic Verbal Fluency (SVF) test                                         | 1 |
| Stroop Color and Word Test (SCWT)                                          | 1 |
| Test set COGBAT - Cognitive Basic Assessment                               | 1 |
| Walking While Talking (WWT) test                                           | 1 |
| Wechsler Adult Intelligence Scale – Fourth Edition (WAIS-IV)               | 1 |

|                                                                      |    |
|----------------------------------------------------------------------|----|
| Wechsler Adult Intelligence Scale – Third Edition<br>(WAIS-III)      | 1  |
| Wechsler Memory Scale (WMS) test                                     | 1  |
| Wisconsin Card Sorting Test-64 (WCST-64)                             | 1  |
| <b>Global quality of life</b>                                        |    |
| 36-Item Short Form Survey (SF-36)                                    | 23 |
| European Quality of Life Questionnaire 5 level<br>version (EQ-5D-5L) | 19 |
| Health-related quality of life (HRQoL)                               | 6  |
| 12-Item Short Form Survey (SF-12)                                    | 3  |
| WHO Quality of Life – BREF (WHOQOL-BREF)                             | 3  |
| PR OMIS-29+2 Profile v2.1 (PROPr)                                    | 1  |
| Quality of Life in Neurological Disorders (Neuro-<br>QOL)            | 1  |
| Short Form-8 (SF-8)                                                  | 1  |
| Utilities Index Mark 3 (HUI3)                                        | 1  |
| <b>Perceived health status</b>                                       |    |
| Fear Avoidance Beliefs Questionnaire (FABQ)                          | 1  |
| The Perceived Medical Condition Self-Management<br>Scale (PMCSMS)    | 1  |
| <b>Delivery of care</b>                                              |    |
| Compliance with treatment                                            | 6  |
| Treatment success rate                                               | 5  |
| Acceptability level                                                  | 3  |

|                                                                                                                                        |   |
|----------------------------------------------------------------------------------------------------------------------------------------|---|
| Clinical Global Impression – Global Improvement (CGI-I)                                                                                | 3 |
| Dropout number/retention rate                                                                                                          | 3 |
| Patient Global Impression of Change (PGIC)                                                                                             | 2 |
| Technology Acceptance Model Questionnaire                                                                                              | 2 |
| Change in Time to Clinical Recovery (TTCR)                                                                                             | 1 |
| Level of satisfaction                                                                                                                  | 1 |
| Semi-structured interviews with physiotherapists and patients on their experiences of virtual reality for rehabilitation from COVID-19 | 1 |
| System Usability Scale (SUS) questionnaire                                                                                             | 1 |
| Treatment credibility and expectancy questionnaire                                                                                     | 1 |
| Usefulness Subscale                                                                                                                    | 1 |
| <b>Resource use</b>                                                                                                                    |   |
| <b>Hospital</b>                                                                                                                        |   |
| Enrollment yield/recruitment rate                                                                                                      | 3 |
| Change in self-reported physician visits                                                                                               | 1 |
| Staff Practicality                                                                                                                     | 1 |
| <b>Adverse events/effects</b>                                                                                                          |   |
| Incidence of treatment-emergent adverse effects (TEAEs)                                                                                | 9 |
| Incidence of serious adverse effects (SAEs)                                                                                            | 4 |

C: complement component; CD: cluster of differentiation; CRP: C-reactive protein; ESR: erythrocyte sedimentation rate; FGF: Fibroblast growth factor 21; GAD: glutamic acid decarboxylase; Ig: immunoglobulin; IL: interleukin; s-TNF-RII: soluble tumour necrosis factor receptor II.

|                                                                                                                                                                                              |   |
|----------------------------------------------------------------------------------------------------------------------------------------------------------------------------------------------|---|
| Naturotherapy + yoga based lifestyle                                                                        | 2 |
| Palmitoylethanolamide + Antioxidant flavonoid luteolin (PEA-LUT)                                            | 2 |
| Transcranial direct current stimulation (tDCS) + Cognitive training                                         | 2 |
| Acupuncture therapy + Budesonide + Olfactory training                                                       | 1 |
| Aerosolized 13 cis retinoic acid or All trans retinoic acid + vitamin D                                     | 1 |
| Basti + Rasayana                                                                                            | 1 |
| Betamethasone drops + auricular acupuncture with laser                                                      | 1 |
| Biometric shirt + Exercise program                                                                          | 1 |
| Cardiopulmonary Rehabilitation + Oxygen therapy                                                             | 1 |
| Chatushashti Prahari Pippali + Rehabilitation                                                               | 1 |
| CoQ10 + Melatonin + Vitamin B + Vitamin D                                                                   | 1 |
| Corticosteroids + Antihistamine                                                                             | 1 |
| Glucocorticoid therapy + Olfactory training                                                                 | 1 |
| Individualized nutrition therapy + Pateitn-tailored physical rehabilitation program                         | 1 |
| Insulin + Gabapentin + Zinx + Ice cube stimulation                                                          | 1 |
| Interferential therapy + short-acting Beta Agonist (SABA) ± Steroid in 45 or 90 degrees sitting position  | 1 |
| Liujunzhi Decoction (LJZD) + Shasehen Majdong Decoction                                                    | 1 |
| Loratadine + Famotidine                                                                                   | 1 |
| Mestinon + Salbutamol                                                                                     | 1 |
| Mitoquinone + Exercise                                                                                    | 1 |
| Mountin spa rehabilitation + Ubiquinol (reduced coenzyme Q10)                                             | 1 |
| NAC (N-acetyl cysteine) + Alpha lipoic acid (ALA) + liposomal glutathione (GSH)                           | 1 |
| Naltrexone + Nicotinamide adenine dinucleotide (NAD+)                                                     | 1 |
| Photobiomodulation + Vitamin B                                                                            | 1 |
| Pirfenidone + Pulmonary rehabilitation                                                                    | 1 |
| Pulmonary Telerehabilitation + Muscle resistance exercises                                                | 1 |
| Pulsed Electromagnetic field therapy + Pulmonary rehabilitation program                                   | 1 |
| Qi Maifei Luoping Mixture + Respiratory Training + Rehabilitation Education Guidance                     | 1 |
| Rajyoga + Yoga based rehabilitation                                                                       | 1 |
| Respiratory Physiotherapy + Neurorehabilitation                                                           | 1 |
| Self- applied acupressure + Qigong course + advice literature                                             | 1 |
| Traditional Chinese Medicine + Psychological intervention                                                 | 1 |
| Vardhamana pippali rasayana + Rehabilitation                                                              | 1 |
| Vitamin K2 (MK-7) + Vitamin D3                                                                            | 1 |
| Yoga based rehabilitation + Herbal Concoction                                                             | 1 |

Symbols next to each intervention represent the targeted system:

Pulmonary system:   
 Cardiovascular system:   
 Non-system specific:   
 Mental health: 

Musculoskeletal system:   
 Nervous system:   
 Gastrointestinal system: 

## Table S3: Cardiovascular System

| Major intervention class and name                                                                                                | Registered trials | Countries                                                                         | Estimated enrollment | Specific clinical use in the trial/s                                                  | Mechanism of action*                                                                                                            | Other general clinical uses                                                                 |
|----------------------------------------------------------------------------------------------------------------------------------|-------------------|-----------------------------------------------------------------------------------|----------------------|---------------------------------------------------------------------------------------|---------------------------------------------------------------------------------------------------------------------------------|---------------------------------------------------------------------------------------------|
| <b>Rehabilitation</b>                                                                                                            |                   |                                                                                   |                      |                                                                                       |                                                                                                                                 |                                                                                             |
| Physical exercise                                                                                                                | 10                | Brazil, Denmark, Indonesia, India, Pakistan, Spain, Sweden, Turkey, United States | 676                  | General cardiopulmonary function and postural orthostatic tachycardia syndrome (POTS) | N/A                                                                                                                             | N/A                                                                                         |
| REmotely monitored, Mobile health supported Multidomain Rehabilitation Program with High Intensity Interval Training (REMM-HIIT) | 1                 | United States                                                                     | 140                  | General cardiopulmonary function                                                      | Remotely monitored tailored, structured, progressive multidomain physical rehabilitation & personalized instruction & coaching. | N/A                                                                                         |
| General rehabilitation including telerehabilitation and physiotherapy                                                            | 2                 | Australia, Norway                                                                 | 80                   | General cardiopulmonary function with focus on dyspnea and physical activity level    | N/A                                                                                                                             | N/A                                                                                         |
| Respiratory muscle training (inspiratory ±expiratory)                                                                            | 2                 | Brazil, Canada                                                                    | 90                   | General lung function (respiratory muscle strength)                                   | N/A                                                                                                                             | N/A                                                                                         |
| Breathing and chest mobilization exercises                                                                                       | 1                 | Indonesia                                                                         | 66                   | General cardiopulmonary function                                                      | N/A                                                                                                                             | N/A                                                                                         |
| Heart rate variability biofeedback                                                                                               | 1                 | Germany                                                                           | 48                   | Heart rate variability                                                                | Registration and visualization of the interrelation of heart rhythm and respiratory rate                                        | N/A                                                                                         |
| <b>Beta Blockers</b>                                                                                                             |                   |                                                                                   |                      |                                                                                       |                                                                                                                                 |                                                                                             |
| Metoprolol succinate                                                                                                             | 1                 | United States                                                                     | 20                   | Tachycardia                                                                           | Beta-1-adrenergic receptor inhibitor                                                                                            | Angina, heart failure, myocardial infarction, atrial fibrillation/flutter, and hypertension |
| <b>Psychostimulants</b>                                                                                                          |                   |                                                                                   |                      |                                                                                       |                                                                                                                                 |                                                                                             |
| Caffeine                                                                                                                         | 1                 | Brazil                                                                            | 34                   | General cardiopulmonary function                                                      | Adenosine A1 receptor antagonism                                                                                                | Apnea of prematurity in infants                                                             |
| <b>Traditional Chinese Medicine (TCM)</b>                                                                                        |                   |                                                                                   |                      |                                                                                       |                                                                                                                                 |                                                                                             |

|                                                |   |                    |      |                                                                                                         |                                                                                                                                          |                                                                                                                                     |
|------------------------------------------------|---|--------------------|------|---------------------------------------------------------------------------------------------------------|------------------------------------------------------------------------------------------------------------------------------------------|-------------------------------------------------------------------------------------------------------------------------------------|
| Jinshuibao tablet                              | 1 | China              | 200  | General cardiopulmonary function                                                                        | N/A                                                                                                                                      | N/A                                                                                                                                 |
| <b>Anti-gout</b>                               |   |                    |      |                                                                                                         |                                                                                                                                          |                                                                                                                                     |
| Colchicine                                     | 1 | India              | 350  | General cardiopulmonary function                                                                        | Disrupts cytoskeletal functions through inhibition of $\beta$ -tubulin polymerization into microtubules                                  | Gout and Familial Mediterranean Fever                                                                                               |
| <b>Cardiac preparations</b>                    |   |                    |      |                                                                                                         |                                                                                                                                          |                                                                                                                                     |
| Ivabradine                                     | 1 | United States      | 250  | Tachycardia                                                                                             | Inhibition of If channels ("funny channels") in the heart                                                                                | Heart failure                                                                                                                       |
| <b>Angiotensin II Receptor Blockers (ARBs)</b> |   |                    |      |                                                                                                         |                                                                                                                                          |                                                                                                                                     |
| Sacubitril/ Valsartan                          | 1 | United States      | 50   | General cardiopulmonary function                                                                        | Inhibits neprilysin and blocks angiotensin I                                                                                             | Hypertension                                                                                                                        |
| <b>HMG CoA Reductase Inhibitors</b>            |   |                    |      |                                                                                                         |                                                                                                                                          |                                                                                                                                     |
| Rosuvastatin                                   | 1 | Spain              | 1080 | General cardiovascular function and decrease mortality associated with myocardial infarction and stroke | Competitive inhibitor of the enzyme HMG-CoA (3-hydroxy-3-methylglutaryl coenzyme A) reductase                                            | Hypercholesterolemia                                                                                                                |
| <b>Other Interventions</b>                     |   |                    |      |                                                                                                         |                                                                                                                                          |                                                                                                                                     |
| Sodium pyruvate nasal spray (EmphyCorp, N115)  | 1 | United States      | 22   | Tachycardia                                                                                             | Reduced nasal and lung inflammation and congestion by reducing inflammatory cytokines including the IL-6 cytokine                        | Chronic obstructive pulmonary disease, pulmonary fibrosis, cystic fibrosis, allergic rhinitis, chronic rhinitis, sinusitis, and flu |
| Taxifolin Aqua                                 | 1 | Russian Federation | 100  | Contractile function                                                                                    | Inhibitory activity against inflammation, malignancies, microbial infection, oxidative stress, cardiovascular disease, and liver disease | N/A                                                                                                                                 |
| <b>Intervention Combinations</b>               |   |                    |      |                                                                                                         |                                                                                                                                          |                                                                                                                                     |
| Naturopathy + Yoga based lifestyle             | 1 | India              | 80   | Heart rate variability                                                                                  | N/A                                                                                                                                      | N/A                                                                                                                                 |

## Table S4: Pulmonary System

| Major intervention class and name                                     | Registered trials | Countries                                                                                                                    | Estimated enrollment | Specific clinical use in the trial/s                                                                          | Mechanism of action*                                                                                                                                                                                                                                                                                             | Other general clinical uses |
|-----------------------------------------------------------------------|-------------------|------------------------------------------------------------------------------------------------------------------------------|----------------------|---------------------------------------------------------------------------------------------------------------|------------------------------------------------------------------------------------------------------------------------------------------------------------------------------------------------------------------------------------------------------------------------------------------------------------------|-----------------------------|
| <b>Rehabilitation</b>                                                 |                   |                                                                                                                              |                      |                                                                                                               |                                                                                                                                                                                                                                                                                                                  |                             |
| Physical exercise                                                     | 23                | Austria, Brazil, Canada, Denmark, Germany, Iran, India, Indonesia, Spain, Turkey                                             | 1605                 | General pulmonary function (functional capacity, vital capacity, and respiratory muscle strength) and dyspnea | N/A                                                                                                                                                                                                                                                                                                              | N/A                         |
| General rehabilitation including telerehabilitation and physiotherapy | 21                | Austria, Brazil, Belgium, China, Egypt, France, Greece India, Iran, Norway, Poland Switzerland, Spain, Turkey, United States | 1755                 | SARS pneumonia and general lung function with focus on dyspnea and physical activity level                    | N/A                                                                                                                                                                                                                                                                                                              | N/A                         |
| Respiratory muscle training (inspiratory ±expiratory)                 | 16                | Brazil, Canada, Egypt, Italy, Pakistan, Sweden, Spain, Turkey                                                                | 727                  | General pulmonary function (respiratory muscle strength), dyspnea, cough, and chest tightness                 | N/A                                                                                                                                                                                                                                                                                                              | N/A                         |
| Breathing and chest mobilization exercises                            | 7                 | Germany, Indonesia, India, Iran, Saudi Arabia, Turkey                                                                        | 292                  | General lung function (functional capacity) and dyspnea                                                       | N/A                                                                                                                                                                                                                                                                                                              | N/A                         |
| Yoga based rehabilitation                                             | 4                 | India, United States                                                                                                         | 514                  | General pulmonary function (compliance)                                                                       | N/A                                                                                                                                                                                                                                                                                                              | N/A                         |
| Virtual reality (VR) rehabilitation                                   | 4                 | Australia, Iran, Switzerland, Turkey                                                                                         | 250                  | General pulmonary function and dyspnea                                                                        | N/A                                                                                                                                                                                                                                                                                                              | N/A                         |
| Counterweight-Plus/DIRECT diet weight management program              | 1                 | United Kingdom                                                                                                               | 200                  | General pulmonary function and dyspnea                                                                        | Diet programs delivered by Counterweight Ltd. via an online platform with text chat, video, or telephone support. Individuals will be allocated a named "Counterweight Coach" for personal support for regular appointments and to moderate an online chat facility to enable peer support between participants. | N/A                         |

|                                                                  |   |                                 |      |                                                                   |                                                                                                         |                                                                                             |
|------------------------------------------------------------------|---|---------------------------------|------|-------------------------------------------------------------------|---------------------------------------------------------------------------------------------------------|---------------------------------------------------------------------------------------------|
| Vocal-based respiratory training                                 | 3 | Germany, Ireland, United States | 92   | General pulmonary function and dyspnea                            | Breathing and singing classes that are designed to correct dis-ordered breathing                        | N/A                                                                                         |
| Manual therapy (hand operated technique and breathing exercises) | 1 | India                           | 54   | General pulmonary function                                        | Therapy using PNF and MET techniques along with breathing exercises                                     | N/A                                                                                         |
| PowerBreathe® and Therosold PEP® tools                           | 1 | United Kingdom                  | 120  | General pulmonary function                                        | N/A                                                                                                     | N/A                                                                                         |
| <b>Beta Blockers</b>                                             |   |                                 |      |                                                                   |                                                                                                         |                                                                                             |
| Metoprolol succinate                                             | 1 | United States                   | 20   | Dyspnea                                                           | Beta-1-adrenergic receptor inhibitor                                                                    | Angina, heart failure, myocardial infarction, atrial fibrillation/flutter, and hypertension |
| <b>Traditional Chinese Medicine (TCM)</b>                        |   |                                 |      |                                                                   |                                                                                                         |                                                                                             |
| Bufei Huoxue Capsule                                             | 1 | China                           | 60   | General pulmonary function                                        | N/A                                                                                                     | N/A                                                                                         |
| Traditional Chinese Medicine Decoction                           | 2 | China                           | 220  | General lung function and pulmonary fibrosis                      | N/A                                                                                                     | N/A                                                                                         |
| Xiaotan Sanjiefang granule                                       | 1 | China                           | 150  | General pulmonary function                                        | N/A                                                                                                     | N/A                                                                                         |
| Shengmai Decoction                                               | 1 | China                           | 100  | General pulmonary function                                        | N/A                                                                                                     | N/A                                                                                         |
| Tai Ji Quan (Tai Chi)                                            | 1 | China                           | 100  | General pulmonary function                                        | N/A                                                                                                     | N/A                                                                                         |
| Electroacupuncture                                               | 1 | Brazil                          | 60   | General pulmonary function                                        | N/A                                                                                                     | N/A                                                                                         |
| Laser acupuncture                                                | 1 | Brazil                          | 60   | General pulmonary function                                        | N/A                                                                                                     | N/A                                                                                         |
| Multi-domain Tai Chi                                             | 1 | United States                   | 200  | General pulmonary function                                        | N/A                                                                                                     | N/A                                                                                         |
| Jinshuibao tablet                                                | 1 | China                           | 200  | General pulmonary function                                        | N/A                                                                                                     | N/A                                                                                         |
| <b>Anti-gout</b>                                                 |   |                                 |      |                                                                   |                                                                                                         |                                                                                             |
| Colchicine                                                       | 3 | Egypt, India, Iran              | 1300 | Acute respiratory distress syndrome, dyspnea & pulmonary fibrosis | Disrupts cytoskeletal functions through inhibition of $\beta$ -tubulin polymerization into microtubules | Gout and Familial Mediterranean Fever                                                       |
| <b>Immunosuppressant</b>                                         |   |                                 |      |                                                                   |                                                                                                         |                                                                                             |



|                          |   |                                                                                                      |     |                                                                    |                                                                                                                                                                                                                             |                                                          |
|--------------------------|---|------------------------------------------------------------------------------------------------------|-----|--------------------------------------------------------------------|-----------------------------------------------------------------------------------------------------------------------------------------------------------------------------------------------------------------------------|----------------------------------------------------------|
| Mycophenolate mofetil    | 1 | India                                                                                                | 60  | COVID-19 related interstitial lung disease                         | Prevents T-cell and B-cell proliferation and the production of cytotoxic T-cells and antibodies                                                                                                                             | Immunosuppressants to prevent organ transplant rejection |
| Pirfenidone              | 4 | China, India, Spain                                                                                  | 272 | General pulmonary function (functional capacity) and lung fibrosis | The exact mechanism of action of pirfenidone is not fully understood. <sup>9</sup> It is suggested that the antioxidant effects of pirfenidone contribute to its anti-inflammatory effects, leading to antifibrotic effects | Idiopathic pulmonary fibrosis (IPF)                      |
| LYT-100 (Deupirfenidone) | 1 | Argentina, Brazil, Moldova, Romania, Republic of Philippines, United States, Ukraine, United Kingdom | 168 | General pulmonary function                                         | The exact mechanism of action of pirfenidone is not fully understood. <sup>9</sup> It is suggested that the antioxidant effects of pirfenidone contribute to its anti-inflammatory effects, leading to antifibrotic effects | Idiopathic pulmonary fibrosis (IPF)                      |

#### Psychostimulants

|          |   |        |    |                            |                                  |                                 |
|----------|---|--------|----|----------------------------|----------------------------------|---------------------------------|
| Caffeine | 1 | Brazil | 34 | General pulmonary function | Adenosine A1 receptor antagonism | Apnea of prematurity in infants |
|----------|---|--------|----|----------------------------|----------------------------------|---------------------------------|

#### Protein Kinase Inhibitor

|            |   |                                     |     |                                                                         |                                                                                                                                            |                                                                                                                                                       |
|------------|---|-------------------------------------|-----|-------------------------------------------------------------------------|--------------------------------------------------------------------------------------------------------------------------------------------|-------------------------------------------------------------------------------------------------------------------------------------------------------|
| Nintedanib | 4 | China, France, India, United States | 524 | General pulmonary function (functional capacity) and pulmonary fibrosis | Competitive, triple angiokinase inhibitor that targets multiple receptor tyrosine kinases (RTKs) and non-receptor tyrosine kinases (nRTKs) | Idiopathic pulmonary fibrosis (IPF) and to slow declining pulmonary function in patients with systemic sclerosis-associated interstitial lung disease |
|------------|---|-------------------------------------|-----|-------------------------------------------------------------------------|--------------------------------------------------------------------------------------------------------------------------------------------|-------------------------------------------------------------------------------------------------------------------------------------------------------|

#### Corticosteroid

|                    |   |        |     |                                  |                                                                                                                                                                                                                                                 |                                                                                                                                                                                                                                                             |
|--------------------|---|--------|-----|----------------------------------|-------------------------------------------------------------------------------------------------------------------------------------------------------------------------------------------------------------------------------------------------|-------------------------------------------------------------------------------------------------------------------------------------------------------------------------------------------------------------------------------------------------------------|
| Prednisolone       | 1 | India  | 130 | General pulmonary function       | Glucocorticoid agonist which inhibits neutrophil apoptosis and demargination; they inhibit phospholipase A2, which decreases the formation of arachidonic acid derivatives and inhibits NF-Kappa B and other inflammatory transcription factors | Anti-inflammatory or immunosuppressive for endocrine, rheumatic, and hematologic disorders; collagen, dermatologic, ophthalmic, respiratory, and gastrointestinal diseases; allergic and edematous states; and other conditions like tuberculous meningitis |
| Prednisone         | 1 | Egypt  | 450 | Post COVID-19 Pulmonary Fibrosis | Glucocorticoid agonist which inhibits neutrophil apoptosis and demargination; they inhibit phospholipase A2, which decreases the formation of arachidonic acid derivatives and inhibits NF-Kappa B and other inflammatory transcription factors | Anti-inflammatory or immunosuppressive for endocrine, rheumatic, and hematologic disorders; collagen, dermatologic, ophthalmic, respiratory, and gastrointestinal diseases; allergic and edematous states; and other conditions like tuberculous meningitis |
| Methylprednisolone | 1 | Turkey | 642 | General pulmonary function       | Glucocorticoid agonist which inhibits neutrophil apoptosis and demargination; they inhibit phospholipase A2, which                                                                                                                              | Anti-inflammatory or immunosuppressive for endocrine, rheumatic, and hematologic disorders; collagen, dermatologic, ophthalmic,                                                                                                                             |

decreases the formation of arachidonic acid derivatives and inhibits NF-Kappa B and other inflammatory transcription factors

respiratory, and gastrointestinal diseases; allergic and edematous states; and other conditions like tuberculous meningitis

### Ayurveda

|                        |   |       |    |                            |     |     |
|------------------------|---|-------|----|----------------------------|-----|-----|
| Bharangi Guda          | 1 | India | 30 | Dyspnea and cough          | N/A | N/A |
| Sahachradi yapan basti | 1 | India | 60 | Dyspnea and cough          | N/A | N/A |
| Aoim-Z tablets         | 1 | India | 30 | General pulmonary function | N/A | N/A |

### Leukotriene Receptor Antagonist

|             |   |              |     |                                      |                                                                                                                                                                                                                                                                                    |                                                                                                                                                           |
|-------------|---|--------------|-----|--------------------------------------|------------------------------------------------------------------------------------------------------------------------------------------------------------------------------------------------------------------------------------------------------------------------------------|-----------------------------------------------------------------------------------------------------------------------------------------------------------|
| Montelukast | 2 | Egypt, Spain | 348 | General pulmonary function and cough | Leukotriene receptor antagonist that binds with high affinity and selectivity to the CysLT type 1 receptor, which consequently assists in inhibiting any physiological actions of CysLTs like LTC4, LTD4, and LTE4 at the receptor that may facilitate asthma or allergic rhinitis | Prophylaxis and chronic treatment of asthma, prevention of exercise-induced bronchoconstriction, and the relief of symptoms of seasonal allergic rhinitis |
|-------------|---|--------------|-----|--------------------------------------|------------------------------------------------------------------------------------------------------------------------------------------------------------------------------------------------------------------------------------------------------------------------------------|-----------------------------------------------------------------------------------------------------------------------------------------------------------|

### Other Interventions

|                                                                                                    |   |                |     |                                                                                                                                                  |                                                                                                                     |                                                                                                |
|----------------------------------------------------------------------------------------------------|---|----------------|-----|--------------------------------------------------------------------------------------------------------------------------------------------------|---------------------------------------------------------------------------------------------------------------------|------------------------------------------------------------------------------------------------|
| Intraoperative use of Positive end-expiratory pressure (PEEP) - Fixed PEEP and individualized PEEP | 1 | India          | 40  | General pulmonary function                                                                                                                       | N/A                                                                                                                 | N/A                                                                                            |
| MON002                                                                                             | 1 | United Kingdom | 5   | Pulmonary fibrosis                                                                                                                               | Autologous monocytes                                                                                                | N/A                                                                                            |
| CIMAvax-EGF®                                                                                       | 1 | Cuba           | 135 | General pulmonary function                                                                                                                       | Therapeutic vaccine rhEGF-rP64k conjugate                                                                           | N/A                                                                                            |
| Transcranial direct current stimulation (tDCS)                                                     | 1 | Brazil         | 30  | General pulmonary function                                                                                                                       | Causing the neuron's resting membrane potential to depolarize or hyperpolarize                                      | Neuropsychiatric conditions such as depression, anxiety, Parkinson's disease, and chronic pain |
| Microcannula Harvest Adipose Derived tissue stromal vascular fraction (tSVF)                       | 1 | United States  | 10  | Pulmonary alveolar proteinosis, chronic obstructive pulmonary disease, idiopathic pulmonary fibrosis, viral pneumonia, interstitial lung disease | Anti-inflammatory and structural potential to improve the residual, permanent damaged alveolar tissues of the lungs | N/A                                                                                            |
| S-1226 (8%) (composed of bronchodilator gas and perflubron)                                        | 1 | Canada         | 48  | General pulmonary function, cough, and dyspnea                                                                                                   | Rapid bronchodilation, enhanced blood oxygenation, improved mucus clearance and reduction of work of breathing      | Asthma, bronchiectasis, and cystic fibrosis                                                    |
| Allogeneic culture-expanded adipose-derived mesenchymal stem cells (MSCs)                          | 1 | United States  | 60  | General pulmonary function                                                                                                                       | N/A                                                                                                                 | Autoimmune diseases, including multiple sclerosis                                              |

|                                                                                      |   |                    |     |                                                                    |                                                                                                                                                                                                                                                                  |                                                                                                                                     |
|--------------------------------------------------------------------------------------|---|--------------------|-----|--------------------------------------------------------------------|------------------------------------------------------------------------------------------------------------------------------------------------------------------------------------------------------------------------------------------------------------------|-------------------------------------------------------------------------------------------------------------------------------------|
| Sodium pyruvate nasal spray (EmphyCorp, N115)                                        | 1 | United States      | 22  | General pulmonary function, dyspnea, and cough                     | Reduced nasal and lung inflammation and congestion by reducing inflammatory cytokines including the IL-6 cytokine                                                                                                                                                | Chronic obstructive pulmonary disease, pulmonary fibrosis, cystic fibrosis, allergic rhinitis, chronic rhinitis, sinusitis, and flu |
| Treamid (bisamide derivative of dicarboxylic acid)                                   | 2 | Russian Federation | 472 | General pulmonary function and exercise tolerance                  | Can chelate metal ions including zinc, copper, iron, magnesium, and calcium and restores the function of various tissues and organs                                                                                                                              | N/A                                                                                                                                 |
| Homeopathic medications                                                              | 1 | India              | 50  | General pulmonary function                                         | N/A                                                                                                                                                                                                                                                              | N/A                                                                                                                                 |
| Taxifolin Aqua                                                                       | 1 | Russian Federation | 100 | General pulmonary function                                         | Inhibitory activity against inflammation, malignancies, microbial infection, oxidative stress, cardiovascular disease, and liver disease                                                                                                                         | N/A                                                                                                                                 |
| Omni-Biotic® Pro-Vi 5                                                                | 1 | Austria            | 20  | General pulmonary function                                         | Probiotics targeting dysbiosis, barrier dysfunction, translocation of bacterial products and hyperinflammation                                                                                                                                                   | N/A                                                                                                                                 |
| Fibrotac                                                                             | 1 | India              | 50  | Dyspnea and cough                                                  | Anti-inflammatory and anti-fibrotic properties                                                                                                                                                                                                                   | Idiopathic pulmonary fibrosis                                                                                                       |
| Resistive Capacitive Monopolar Radio Frequency at 448 kHz (INDIBA®) (RFMCR)          | 1 | Spain              | 24  | Dyspnea                                                            | Metabolic stimulation, increased vascularization, and oxygenation of directly affected tissues, effects of deep hyperthermia generated by the interaction of the current with the treated biological substrate, as well as the activation of tissue regeneration | Neurological and pneumological pathologies                                                                                          |
| ADAPT-232                                                                            | 1 | Georgia            | 100 | Dyspnea                                                            | N/A                                                                                                                                                                                                                                                              | N/A                                                                                                                                 |
| <b>Intervention Combinations</b>                                                     |   |                    |     |                                                                    |                                                                                                                                                                                                                                                                  |                                                                                                                                     |
| Mountain spa rehabilitation + Ubiquinol (reduced coenzyme Q10)                       | 1 | Slovakia           | 51  | Chronic pulmonary diseases                                         | N/A                                                                                                                                                                                                                                                              | N/A                                                                                                                                 |
| Qi Maifei Luoping Mixture + Respiratory Training + Rehabilitation Education Guidance | 1 | China              | 80  | General pulmonary function                                         | N/A                                                                                                                                                                                                                                                              | N/A                                                                                                                                 |
| Pirfenidone + Pulmonary rehabilitation                                               | 1 | India              | 60  | General pulmonary function (functional capacity) and lung fibrosis | N/A                                                                                                                                                                                                                                                              | N/A                                                                                                                                 |
| Biometric shirt + Exercise program                                                   | 1 | Canada             | 20  | General pulmonary function and dyspnea                             | N/A                                                                                                                                                                                                                                                              | N/A                                                                                                                                 |

|                                                                                                     |   |         |     |                                                   |     |     |
|-----------------------------------------------------------------------------------------------------|---|---------|-----|---------------------------------------------------|-----|-----|
| Pulsed Electromagnetic field therapy + Pulmonary rehabilitation program                             | 1 | Spain   | 33  | General pulmonary function and exercise tolerance | N/A | N/A |
| Pulmonary Telerehabilitation + Muscle resistance exercises                                          | 1 | Turkey  | 52  | Exercise tolerance                                | N/A | N/A |
| Interferential therapy + Short-Acting Beta-Agonists (SABA) ± Steroid in 45 degrees sitting position | 1 | Nigeria | 48  | General pulmonary function                        | N/A | N/A |
| Interferential therapy + Short-Acting Beta-Agonists (SABA) ± Steroid in 90 degrees sitting position | 1 | Nigeria | 48  | General pulmonary function                        | N/A | N/A |
| Respiratory Physiotherapy + Neurorehabilitation                                                     | 1 | Spain   | 200 | General pulmonary function                        | N/A | N/A |

## Table S5: Nervous System

| Major intervention class and name                     | Registered trials | Countries                                                 | Estimated enrollment | Specific clinical use in the trial/s                                                     | Mechanism of action*                                                                                                                        | Other general clinical uses                                                        |
|-------------------------------------------------------|-------------------|-----------------------------------------------------------|----------------------|------------------------------------------------------------------------------------------|---------------------------------------------------------------------------------------------------------------------------------------------|------------------------------------------------------------------------------------|
| <b>Rehabilitation</b>                                 |                   |                                                           |                      |                                                                                          |                                                                                                                                             |                                                                                    |
| Cognitive rehabilitation                              | 6                 | Canada, Germany, India, Luxembourg, Norway, United States | 603                  | Cognitive disorder                                                                       | N/A                                                                                                                                         | N/A                                                                                |
| Respiratory muscle training (inspiratory ±expiratory) | 1                 | Canada                                                    | 60                   | Cognitive disorder                                                                       | N/A                                                                                                                                         | N/A                                                                                |
| Olfactory training                                    | 6                 | Brazil, Canada, United Kingdom, United States             | 761                  | Anosmia and dysgeusia                                                                    | N/A                                                                                                                                         | N/A                                                                                |
| Neurorehabilitation                                   | 2                 | Austria, Czech Republic                                   | 40                   | Anosmia, dysgeusia, dizziness, seizures, migraines, attention, concentration, and memory | N/A                                                                                                                                         | N/A                                                                                |
| Proprioceptive Training                               | 1                 | Brazil                                                    | 20                   | Tinnitus                                                                                 | Use of somatosensory signals such as proprioceptive or tactile afferents in the absence of information from other modalities such as vision | Restore sensorimotor function                                                      |
| Exercise                                              | 1                 | Canada                                                    | 75                   | Anosmia and dysgeusia                                                                    | N/A                                                                                                                                         | N/A                                                                                |
| Virtual reality (VR) rehabilitation                   | 1                 | Netherlands                                               | 48                   | Cognitive disorder                                                                       | N/A                                                                                                                                         | N/A                                                                                |
| Sniffin' sticks Duftquartett                          | 1                 | Austria                                                   | 100                  | Anosmia                                                                                  | N/A                                                                                                                                         | N/A                                                                                |
| AKL-T01 (Akili Interactive)                           | 1                 | United States                                             | 125                  | Cognitive disorder                                                                       | A remotely delivered digital cognitive intervention                                                                                         | Improve attention in children with attention-deficit/hyperactivity disorder (ADHD) |
| <b>Antidepressants</b>                                |                   |                                                           |                      |                                                                                          |                                                                                                                                             |                                                                                    |
| Vortioxetine                                          | 1                 | Canada                                                    | 200                  | Cognitive disorder                                                                       | Serotonin modulator and simulator                                                                                                           | Major depressive disorder                                                          |

### Nervous system drugs

|                                                          |   |               |    |                       |                                                                                                                                                                                                                                                  |                                                                                                                                                                                                                                                                                                                                                                        |
|----------------------------------------------------------|---|---------------|----|-----------------------|--------------------------------------------------------------------------------------------------------------------------------------------------------------------------------------------------------------------------------------------------|------------------------------------------------------------------------------------------------------------------------------------------------------------------------------------------------------------------------------------------------------------------------------------------------------------------------------------------------------------------------|
| Fampridine                                               | 1 | Switzerland   | 44 | Amnesia               | Inhibits voltage-gated potassium channels in the CNS to maintain the transmembrane potential and prolong action potential                                                                                                                        | Neurofunctional modifier that helps improve walking speed in patients with multiple sclerosis                                                                                                                                                                                                                                                                          |
| <b>Vitamins</b>                                          |   |               |    |                       |                                                                                                                                                                                                                                                  |                                                                                                                                                                                                                                                                                                                                                                        |
| Vitamin D3                                               | 1 | Egypt         | 60 | Anosmia               | N/A                                                                                                                                                                                                                                              | Refractory rickets (or vitamin D resistant rickets), hypoparathyroidism, and familial hypophosphatemia                                                                                                                                                                                                                                                                 |
| <b>Blood glucose lowering drugs</b>                      |   |               |    |                       |                                                                                                                                                                                                                                                  |                                                                                                                                                                                                                                                                                                                                                                        |
| Intranasal insulin                                       | 1 | Mexico        | 27 | Anosmia               | Agonist at the insulin receptor and activator of insulin-like growth factor 1 (IGF-1) receptor                                                                                                                                                   | Improve glycemic control in adults and children with diabetes mellitus                                                                                                                                                                                                                                                                                                 |
| <b>Pituitary and hypothalamic hormones and analogues</b> |   |               |    |                       |                                                                                                                                                                                                                                                  |                                                                                                                                                                                                                                                                                                                                                                        |
| Somatropin                                               | 1 | United States | 83 | Cognitive disorder    | Growth hormone and prolactin receptors ligand and promotes production of insulin-like growth factor-1 (IGF-1)                                                                                                                                    | Pediatric patients who have growth failure due to an inadequate secretion of endogenous growth hormone or syndromic short stature. Also, adults with adult-onset growth hormone deficiency, either alone or associated with multiple hormone deficiencies (hypopituitarism), because of pituitary disease, hypothalamic disease, surgery, radiation therapy, or trauma |
| <b>Xanthines</b>                                         |   |               |    |                       |                                                                                                                                                                                                                                                  |                                                                                                                                                                                                                                                                                                                                                                        |
| Theophylline                                             | 1 | United States | 62 | Anosmia and dysgeusia | Relaxes the smooth muscle of the bronchial airways and pulmonary blood vessels and reduces airway responsiveness to histamine, methacholine, adenosine, and allergen while competitively inhibiting type III and type IV phosphodiesterase (PDE) | Chronic asthma and other chronic lung diseases, such as emphysema and chronic bronchitis                                                                                                                                                                                                                                                                               |
| <b>Anticholinesterases (Anti-dementia drugs)</b>         |   |               |    |                       |                                                                                                                                                                                                                                                  |                                                                                                                                                                                                                                                                                                                                                                        |
| Donepezil                                                | 1 | Iran          | 70 | Memory impairment     | Selectively and reversibly inhibits the acetylcholinesterase enzyme, enhancing cholinergic transmission                                                                                                                                          | Alzheimer's dementia                                                                                                                                                                                                                                                                                                                                                   |
| <b>Blood and related products</b>                        |   |               |    |                       |                                                                                                                                                                                                                                                  |                                                                                                                                                                                                                                                                                                                                                                        |
| Platelet rich plasma (PRP)                               | 1 | Belgium       | 56 | Anosmia               | Increase the concentration of specific bioproteins or hormones                                                                                                                                                                                   | Musculoskeletal injuries, post-surgical Healing, osteoarthritis, hair Loss, and skin rejuvenation                                                                                                                                                                                                                                                                      |
| <b>H2-receptor Antagonists</b>                           |   |               |    |                       |                                                                                                                                                                                                                                                  |                                                                                                                                                                                                                                                                                                                                                                        |
| Famotidine                                               | 1 | Iran          | 50 | Cognitive disorder    | N/A                                                                                                                                                                                                                                              | Active duodenal ulcer (DU), active gastric ulcer, symptomatic non-erosive gastroesophageal reflux disease (GERD), and erosive esophagitis due to GERD                                                                                                                                                                                                                  |

### Avermectines

|            |   |       |     |         |                                                                                                                                                                                                                                                                                                        |                                                                                                                  |
|------------|---|-------|-----|---------|--------------------------------------------------------------------------------------------------------------------------------------------------------------------------------------------------------------------------------------------------------------------------------------------------------|------------------------------------------------------------------------------------------------------------------|
| Ivermectin | 2 | Egypt | 177 | Anosmia | Agonist of the neurotransmitter gamma-aminobutyric acid (GABA), thereby disrupting GABA-mediated central nervous system neurosynaptic transmission. Also, binds selectively and with high affinity to glutamate-gated chloride ion channels in invertebrate muscle and nerve cells of the microfilaria | Intestinal strongyloidiasis caused by Strongyloides stercoralis and onchocerciasis caused by Onchocerca volvulus |
|------------|---|-------|-----|---------|--------------------------------------------------------------------------------------------------------------------------------------------------------------------------------------------------------------------------------------------------------------------------------------------------------|------------------------------------------------------------------------------------------------------------------|

### Antiepileptics

|            |   |               |    |         |                                                                     |                                                                                                                                                                             |
|------------|---|---------------|----|---------|---------------------------------------------------------------------|-----------------------------------------------------------------------------------------------------------------------------------------------------------------------------|
| Gabapentin | 1 | United States | 50 | Anosmia | Voltage-dependent calcium channel subunit alpha-2/delta-1 inhibitor | Postherpetic neuralgia in adults and for the adjunctive treatment of partial-onset seizures, with or without secondary generalization, in patients 3 years of age and older |
|------------|---|---------------|----|---------|---------------------------------------------------------------------|-----------------------------------------------------------------------------------------------------------------------------------------------------------------------------|

### Corticosteroids

|                    |   |                |     |                               |                                                                                                                                                                                                                                                 |                                                                                                                                                                                                                                                             |
|--------------------|---|----------------|-----|-------------------------------|-------------------------------------------------------------------------------------------------------------------------------------------------------------------------------------------------------------------------------------------------|-------------------------------------------------------------------------------------------------------------------------------------------------------------------------------------------------------------------------------------------------------------|
| Mometasone         | 2 | Iran, Thailand | 106 | Anosmia and hyposmia          | Glucocorticoid agonist which inhibits neutrophil apoptosis and demargination; they inhibit phospholipase A2, which decreases the formation of arachidonic acid derivatives and inhibits NF-Kappa B and other inflammatory transcription factors | Seasonal allergic and perennial allergic rhinitis, and prophylactic for asthma                                                                                                                                                                              |
| Budesonide         | 1 | France         | 120 | Hyposmia                      | Glucocorticoid agonist which inhibits neutrophil apoptosis and demargination; they inhibit phospholipase A2, which decreases the formation of arachidonic acid derivatives and inhibits NF-Kappa B and other inflammatory transcription factors | Crohn's disease, prophylactic therapy in asthma, COPD exacerbations, hay fever, and upper respiratory allergies                                                                                                                                             |
| Prednisolone       | 1 | Netherlands    | 116 | Anosmia                       | Glucocorticoid agonist which inhibits neutrophil apoptosis and demargination; they inhibit phospholipase A2, which decreases the formation of arachidonic acid derivatives and inhibits NF-Kappa B and other inflammatory transcription factors | Anti-inflammatory or immunosuppressive for endocrine, rheumatic, and hematologic disorders; collagen, dermatologic, ophthalmic, respiratory, and gastrointestinal diseases; allergic and edematous states; and other conditions like tuberculous meningitis |
| Methylprednisolone | 1 | United State   | 60  | General neurological symptoms | Glucocorticoid agonist which inhibits neutrophil apoptosis and demargination; they inhibit phospholipase A2, which decreases the formation of arachidonic acid derivatives and inhibits NF-Kappa B and other inflammatory transcription factors | Anti-inflammatory or immunosuppressive for endocrine, rheumatic, and hematologic disorders; collagen, dermatologic, ophthalmic, respiratory, and gastrointestinal diseases; allergic and edematous states; and other conditions like tuberculous meningitis |

### Education

|                                       |   |         |     |                    |     |     |
|---------------------------------------|---|---------|-----|--------------------|-----|-----|
| Cognitive psychoeducation             | 1 | Belgium | 130 | Cognitive disorder | N/A | N/A |
| Education and strategies intervention | 1 | Canada  | 270 | Cognitive disorder | N/A | N/A |

**Traditional Chinese Medicine (TCM)**

|             |   |           |     |         |     |     |
|-------------|---|-----------|-----|---------|-----|-----|
| Acupuncture | 1 | Hong Kong | 100 | Anosmia | N/A | N/A |
|-------------|---|-----------|-----|---------|-----|-----|

**Hematological Agents**

|          |   |               |    |                               |                                                                                                            |                       |
|----------|---|---------------|----|-------------------------------|------------------------------------------------------------------------------------------------------------|-----------------------|
| Ruconest | 1 | United States | 40 | General neurological symptoms | C1 Esterase Inhibitor (recombinant) regulating the activation of the complement and contact system pathway | Hereditary angioedema |
|----------|---|---------------|----|-------------------------------|------------------------------------------------------------------------------------------------------------|-----------------------|

**Antipsychotics**

|          |   |               |    |          |                                                                 |                                                                           |
|----------|---|---------------|----|----------|-----------------------------------------------------------------|---------------------------------------------------------------------------|
| Pimozide | 1 | United States | 50 | Tinnitus | Inhibits the dopamine D2 receptor in the central nervous system | Suppression of motor and phonic tics in patients with Tourette's Disorder |
|----------|---|---------------|----|----------|-----------------------------------------------------------------|---------------------------------------------------------------------------|

**Ayurveda**

|                |   |       |    |                    |     |     |
|----------------|---|-------|----|--------------------|-----|-----|
| Aoim-Z tablets | 1 | India | 30 | Cognitive disorder | N/A | N/A |
|----------------|---|-------|----|--------------------|-----|-----|

**Other Interventions**

|                                                                                  |   |               |    |                               |     |                                                   |
|----------------------------------------------------------------------------------|---|---------------|----|-------------------------------|-----|---------------------------------------------------|
| Hope Biosciences adipose-derived mesenchymal stem cells – allogeneic (HB-adMSCs) | 1 | United States | 80 | General neurological symptoms | N/A | Autoimmune diseases, including multiple sclerosis |
|----------------------------------------------------------------------------------|---|---------------|----|-------------------------------|-----|---------------------------------------------------|

|              |   |       |     |                     |                                                                                                          |                           |
|--------------|---|-------|-----|---------------------|----------------------------------------------------------------------------------------------------------|---------------------------|
| Cerebrolysin | 1 | Egypt | 100 | Anosmia and ageusia | Neurotrophic and neuroprotective properties may promote recovery of olfactory and gustatory dysfunctions | Cerebrovascular disorders |
|--------------|---|-------|-----|---------------------|----------------------------------------------------------------------------------------------------------|---------------------------|

|                   |   |        |    |                    |                                                                                |     |
|-------------------|---|--------|----|--------------------|--------------------------------------------------------------------------------|-----|
| Hyperbaric oxygen | 1 | Israel | 91 | Cognitive disorder | Improve pulmonary gas exchange by restoring hypoxic pulmonary vasoconstriction | N/A |
|-------------------|---|--------|----|--------------------|--------------------------------------------------------------------------------|-----|

|                    |   |        |     |                                                 |                                                                                                                                                                                                                                                                                      |                                                 |
|--------------------|---|--------|-----|-------------------------------------------------|--------------------------------------------------------------------------------------------------------------------------------------------------------------------------------------------------------------------------------------------------------------------------------------|-------------------------------------------------|
| Photobiomodulation | 2 | Brazil | 130 | Dysgeusia, tension headache, and orofacial pain | Light therapy that induces a complex chain of physiological reactions in diseased and damaged tissues to accelerate wound healing and tissue regeneration, increase circulation, reduce acute inflammation, reduce acute and chronic pain, and help restore normal cellular function | Stimulate hair growth and decrease fat deposits |
|--------------------|---|--------|-----|-------------------------------------------------|--------------------------------------------------------------------------------------------------------------------------------------------------------------------------------------------------------------------------------------------------------------------------------------|-------------------------------------------------|

|                                               |   |        |    |                    |     |     |
|-----------------------------------------------|---|--------|----|--------------------|-----|-----|
| Inogen One® G4 (portable oxygen concentrator) | 1 | Canada | 20 | Cognitive disorder | N/A | N/A |
|-----------------------------------------------|---|--------|----|--------------------|-----|-----|

|                        |   |      |    |                     |                                          |                                                                                  |
|------------------------|---|------|----|---------------------|------------------------------------------|----------------------------------------------------------------------------------|
| Whole body cryotherapy | 1 | Iran | 45 | Anosmia or hyposmia | Reduces inflammation and painful effects | To relieve muscle pain, sprains and swelling after soft tissue damage or surgery |
|------------------------|---|------|----|---------------------|------------------------------------------|----------------------------------------------------------------------------------|



|                                                                             |   |                       |     |                                |                                                                                                                                                                                                                                                                  |                                                                                                |
|-----------------------------------------------------------------------------|---|-----------------------|-----|--------------------------------|------------------------------------------------------------------------------------------------------------------------------------------------------------------------------------------------------------------------------------------------------------------|------------------------------------------------------------------------------------------------|
| Transcranial direct current stimulation (tDCS)                              | 2 | Iran, United States   | 50  | Anosmia and cognitive disorder | Causing the neuron's resting membrane potential to depolarize or hyperpolarize                                                                                                                                                                                   | Neuropsychiatric conditions such as depression, anxiety, Parkinson's disease, and chronic pain |
| Transcutaneous auricular vagus nerve stimulation (TENS)                     | 2 | France, United States | 50  | Pain and headache              | Enhances brain GABA and noradrenaline levels                                                                                                                                                                                                                     | Epilepsy and depression                                                                        |
| Stellate ganglion block                                                     | 1 | United States         | 20  | Anosmia                        | Blocking the sympathetic neuronal firing and resetting the balance of the autonomic nervous system                                                                                                                                                               | Complex regional pain syndrome and peripheral vascular disease                                 |
| Cracie Bojungikgi-tang extract                                              | 1 | Republic of Korea     | 45  | Cognitive disorder             | N/A                                                                                                                                                                                                                                                              | N/A                                                                                            |
| Gyeongbang Gyeongok-go                                                      | 1 | Republic of Korea     | 45  | Cognitive disorder             | N/A                                                                                                                                                                                                                                                              | N/A                                                                                            |
| Hanpoong Soonsimhwan                                                        | 1 | Republic of Korea     | 45  | Cognitive disorder             | N/A                                                                                                                                                                                                                                                              | N/A                                                                                            |
| Niagen (Vitamin B3)                                                         | 1 | United States         | 100 | Cognitive disorder             | Increase NAD+ (nicotinamide adenine dinucleotide) level, a vital coenzyme naturally produced in the body, that promotes cellular defense, resilience, and repair                                                                                                 | Cardiovascular, neurodegenerative, and metabolic disorders                                     |
| Temelimab (formerly GNBAC1)                                                 | 1 | Switzerland           | 200 | Cognitive disorder             | Humanized IgG4 monoclonal antibody that binds HERV-W-ENV and antagonizes its capacity for immune cell activation and inhibition of oligodendrocyte precursor cell maturation                                                                                     | Multiple sclerosis                                                                             |
| Low-intensity pulsed ultrasound                                             | 1 | Iran                  | 30  | Anosmia                        | Induce regenerative and anti-inflammatory effects on biological tissues                                                                                                                                                                                          | Soft tissue injuries                                                                           |
| Resistive Capacitive Monopolar Radio Frequency at 448 kHz (INDIBA®) (RFMCR) | 1 | Spain                 | 24  | Neuropathy                     | Metabolic stimulation, increased vascularization, and oxygenation of directly affected tissues, effects of deep hyperthermia generated by the interaction of the current with the treated biological substrate, as well as the activation of tissue regeneration | Neurological and pneumological pathologies                                                     |
| Human immunoglobulin G (IVIG)                                               | 1 | United State          | 60  | General neurological symptoms  | Competitively blocks gamma Fc receptors, preventing the binding and ingestion of phagocytes and suppressing platelet depletion                                                                                                                                   | Immunodeficiency and a wide variety of autoimmune disorders                                    |
| <b>Intervention combinations</b>                                            |   |                       |     |                                |                                                                                                                                                                                                                                                                  |                                                                                                |
| Betamethasone drops + Auricular Acupuncture with the laser                  | 1 | Iran                  | 90  | Anosmia                        | N/A                                                                                                                                                                                                                                                              | N/A                                                                                            |
| Corticosteroids + Antihistamines                                            | 1 | Egypt                 | 200 | Anosmia                        | N/A                                                                                                                                                                                                                                                              | N/A                                                                                            |

|                                                                     |   |                                           |       |                             |     |     |
|---------------------------------------------------------------------|---|-------------------------------------------|-------|-----------------------------|-----|-----|
| Transcranial direct current stimulation (tDCS) + Cognitive training | 2 | Brazil, Germany                           | 120   | Cognitive disorder          | N/A | N/A |
| Aerosolized 13 cis retinoic acid + Vitamin D                        | 1 | China, Egypt, Saudi Arabia, United States | 10000 | Anosmia                     | N/A | N/A |
| Aerosolized All trans retinoic acid + Vitamin D                     | 1 | China, Egypt, Saudi Arabia, United States | 10000 | Anosmia                     | N/A | N/A |
| Insulin + Gabapentin + Zinc + Ice cube stimulation                  | 1 | Saudi Arabia                              | 22    | Anosmia and dysgeusia       | N/A | N/A |
| Photobiomodulation + Vitamin B                                      | 1 | Brazil                                    | 180   | Dysgeusia                   | N/A | N/A |
| Acupuncture therapy + Budesonide + Olfactory training               | 1 | United States                             | 100   | Anosmia                     | N/A | N/A |
| Glucocorticoid therapy + Olfactory training                         | 1 | China                                     | 124   | Anosmia                     | N/A | N/A |
| Palmitoylethanolamide + Antioxidant flavonoid luteolin (PEA-LUT)    | 2 | Italy                                     | 234   | Anosmia, cognitive disorder | N/A | N/A |
| CoQ10 + Melatonin + Vitamin B + Vitamin D                           | 1 | Iran                                      | 80    | Headache                    | N/A | N/A |
| Respiratory Physiotherapy + Neurorehabilitation                     | 1 | Spain                                     | 200   | Anosmia and dysgeusia       | N/A | N/A |

**Table S6: Gastrointestinal System**

| Major intervention class and name         | Registered trials | Countries | Estimated enrollment | Specific clinical use in the trial/s                          | Mechanism of action*                                                                                           | Other general clinical uses |
|-------------------------------------------|-------------------|-----------|----------------------|---------------------------------------------------------------|----------------------------------------------------------------------------------------------------------------|-----------------------------|
| <b>Traditional Chinese Medicine (TCM)</b> |                   |           |                      |                                                               |                                                                                                                |                             |
| Xiangsha Liujun pill                      | 1                 | China     | 200                  | Abdominal distension and loose stools                         | N/A                                                                                                            | N/A                         |
| Lu-Dang-Shen oral liquid                  | 1                 | China     | 200                  | Abdominal distension, loose stools, and digestive dysfunction | N/A                                                                                                            | N/A                         |
| <b>Other Interventions</b>                |                   |           |                      |                                                               |                                                                                                                |                             |
| Omni-Biotic® Pro-Vi 5                     | 1                 | Austria   | 20                   | General gastrointestinal function                             | Probiotics targeting dysbiosis, barrier dysfunction, translocation of bacterial products and hyperinflammation | N/A                         |
| Mediterranean diet                        | 1                 | Spain     | 95                   | General gastrointestinal function                             | N/A                                                                                                            | N/A                         |
| <b>Intervention combinations</b>          |                   |           |                      |                                                               |                                                                                                                |                             |
| CoQ10 + Melatonin + Vitamin B + Vitamin D | 1                 | Iran      | 80                   | Constipation                                                  | N/A                                                                                                            | N/A                         |

**Table S7: Mental Health**

| Major intervention class and name                                     | Registered trials | Countries                                        | Estimated enrollment | Specific clinical use in the trial/s                              | Mechanism of action*                                                                                                                                                                                                                                                                                             | Other general clinical uses |
|-----------------------------------------------------------------------|-------------------|--------------------------------------------------|----------------------|-------------------------------------------------------------------|------------------------------------------------------------------------------------------------------------------------------------------------------------------------------------------------------------------------------------------------------------------------------------------------------------------|-----------------------------|
| <b>Rehabilitation</b>                                                 |                   |                                                  |                      |                                                                   |                                                                                                                                                                                                                                                                                                                  |                             |
| General rehabilitation including telerehabilitation and physiotherapy | 6                 | Australia, China, Germany, Spain, United Kingdom | 857                  | General mental health and anxiety, depression, and sleep disorder | N/A                                                                                                                                                                                                                                                                                                              | N/A                         |
| Respiratory muscle training (inspiratory ±expiratory)                 | 3                 | Brazil, Canada, Turkey                           | 104                  | Anxiety, depression, psychological stress, and sleep disorder     | N/A                                                                                                                                                                                                                                                                                                              | N/A                         |
| Physical exercise                                                     | 5                 | Brazil, Pakistan, Spain, Turkey, United States   | 346                  | Psychological stress, anxiety, depression, and sleep disorder     | N/A                                                                                                                                                                                                                                                                                                              | N/A                         |
| Yoga based rehabilitation                                             | 2                 | India, United States                             | 268                  | Mental health                                                     | N/A                                                                                                                                                                                                                                                                                                              | N/A                         |
| Virtual reality (VR) rehabilitation                                   | 1                 | Netherlands                                      | 48                   | Psychological stress                                              | N/A                                                                                                                                                                                                                                                                                                              | N/A                         |
| Counterweight-Plus/DIRECT diet weight management program              | 1                 | United Kingdom                                   | 200                  | Anxiety and depression                                            | Diet programs delivered by Counterweight Ltd. via an online platform with text chat, video, or telephone support. Individuals will be allocated a named "Counterweight Coach" for personal support for regular appointments and to moderate an online chat facility to enable peer support between participants. | N/A                         |
| Neurorehabilitation                                                   | 2                 | Austria, Czech Republic                          | 40                   | Anxiety, attention disorders, sleep disorder, and depression      | N/A                                                                                                                                                                                                                                                                                                              | N/A                         |
| Benson's relaxation technique                                         | 1                 | Iran                                             | 100                  | Anxiety                                                           | N/A                                                                                                                                                                                                                                                                                                              | N/A                         |
| <b>Education</b>                                                      |                   |                                                  |                      |                                                                   |                                                                                                                                                                                                                                                                                                                  |                             |
| Education and strategies intervention                                 | 1                 | Canada                                           | 270                  | Psychiatric symptoms                                              | N/A                                                                                                                                                                                                                                                                                                              | N/A                         |
| <b>Traditional Chinese Medicine (TCM)</b>                             |                   |                                                  |                      |                                                                   |                                                                                                                                                                                                                                                                                                                  |                             |
| Shumian Capsule                                                       | 1                 | China                                            | 100                  | Sleep disorder, anxiety, and depression and other mood disorders  | N/A                                                                                                                                                                                                                                                                                                              | N/A                         |

|                                                  |   |                |     |                                                               |                                                                                                                                                                   |                                                            |
|--------------------------------------------------|---|----------------|-----|---------------------------------------------------------------|-------------------------------------------------------------------------------------------------------------------------------------------------------------------|------------------------------------------------------------|
| Xiaoyao capsule                                  | 1 | China          | 100 | Irritability, anxiety, and sleep disorder                     | N/A                                                                                                                                                               | N/A                                                        |
| <b>Ayurveda</b>                                  |   |                |     |                                                               |                                                                                                                                                                   |                                                            |
| Shirodhara                                       | 1 | India          | 80  | Anxiety and depression                                        | N/A                                                                                                                                                               | N/A                                                        |
| Saraswat Churna                                  | 1 | India          | 60  | Anxiety                                                       | N/A                                                                                                                                                               | N/A                                                        |
| Bharangi Guda                                    | 1 | India          | 30  | Sleep disorder                                                | N/A                                                                                                                                                               | N/A                                                        |
| Aoim-Z tablets                                   | 1 | India          | 30  | Anxiety                                                       | N/A                                                                                                                                                               | N/A                                                        |
| <b>Psychostimulants</b>                          |   |                |     |                                                               |                                                                                                                                                                   |                                                            |
| Caffeine                                         | 1 | Brazil         | 34  | Mental fatigue                                                | Adenosine A1 receptor antagonism                                                                                                                                  | Apnea of prematurity in infants                            |
| <b>Psychotherapy</b>                             |   |                |     |                                                               |                                                                                                                                                                   |                                                            |
| Cognitive behavioral therapy (CBT)               | 2 | Norway, Turkey | 396 | Depression, anxiety, and psychological stress                 | N/A                                                                                                                                                               | Different mental health conditions                         |
| Telemedicine mindfulness-based protocol          | 1 | Italy          | 40  | Symptoms of post-traumatic stress disorder                    | N/A                                                                                                                                                               | N/A                                                        |
| Mindful self-compassion treatment                | 1 | Iran           | 75  | Anxiety                                                       | N/A                                                                                                                                                               | N/A                                                        |
| Wearable brain sensing wellness device (Muse™-S) | 1 | United States  | 60  | Stress and anxiety                                            | Clinical grade, headband style, wireless electroencephalogram system designed to interact with a mobile device and regulate brain activity by biological feedback | N/A                                                        |
| PACS Coping and Recovery (PACS-CR) Intervention  | 1 | United States  | 36  | Depression, anxiety, suicidal ideation, and identity concerns | Improve psychological adjustment to PACS symptoms, promote resiliency, and facilitate coping                                                                      | N/A                                                        |
| <b>Other Interventions</b>                       |   |                |     |                                                               |                                                                                                                                                                   |                                                            |
| Niagen (Vitamin B3)                              | 1 | United States  | 100 | Anxiety and depression                                        | Increase NAD+ (nicotinamide adenine dinucleotide) level, a vital coenzyme naturally produced in the body, that promotes cellular defense, resilience, and repair  | Cardiovascular, neurodegenerative, and metabolic disorders |
| MYMD1                                            | 1 | United States  | 90  | Depression                                                    | Regulates the immuno-metabolic system through the modulation of numerous pro-inflammatory cytokines, including TNF- $\alpha$ , IL-6 and IL-17A                    | Sarcopenia                                                 |

|                                                           |   |               |     |                                                              |                                                                                                                                                                                                            |                                                     |
|-----------------------------------------------------------|---|---------------|-----|--------------------------------------------------------------|------------------------------------------------------------------------------------------------------------------------------------------------------------------------------------------------------------|-----------------------------------------------------|
| Cranial electrotherapy stimulation (CES)                  | 1 | Germany       | 40  | Anxiety                                                      | Change in electric waves of the brain with an increase of alpha-waves and a decrease of beta- and delta-waves, as well as a change of concentration of neurotransmitters, e.g. beta-endorphin or serotonin | Depression, fatigue, and cognitive disabilities.    |
| Transcutaneous auricular vagus nerve stimulation (TENS)   | 1 | United States | 20  | Forgetfulness, and confusion                                 | Enhances brain GABA and noradrenaline levels                                                                                                                                                               | Epilepsy and depression                             |
| Hyperbaric oxygen                                         | 1 | Israel        | 91  | Insomnia                                                     | Improve pulmonary gas exchange by restoring hypoxic pulmonary vasoconstriction                                                                                                                             | N/A                                                 |
| Temelimab (formerly GNBAC1)                               | 1 | Switzerland   | 200 | Neuropsychiatric function                                    | Humanized IgG4 monoclonal antibody that binds HERV-W-ENV and antagonizes its capacity for immune cell activation and inhibition of oligodendrocyte precursor cell maturation                               | Multiple sclerosis                                  |
| Allogenic marrow stromal cells (MSCs)                     | 1 | United States | 32  | Depression                                                   | Attenuate post-covid inflammation and reduce the resulting neuropsychiatric symptoms                                                                                                                       | Degenerative, inflammatory, and autoimmune diseases |
| ADAPT-232                                                 | 1 | Georgia       | 100 | Anxiety and depression                                       | N/A                                                                                                                                                                                                        | N/A                                                 |
| <b>Intervention Combinations</b>                          |   |               |     |                                                              |                                                                                                                                                                                                            |                                                     |
| Traditional Chinese Medicine + Psychological intervention | 1 | China         | 30  | Depression                                                   | N/A                                                                                                                                                                                                        | N/A                                                 |
| Cardiopulmonary Rehabilitation + Oxygen therapy           | 1 | United States | 24  | Mental health and cognition                                  | N/A                                                                                                                                                                                                        | N/A                                                 |
| Yoga based rehabilitation + Herbal Concoction             | 1 | India         | 66  | Anxiety, post-traumatic stress disorder, and quality of life | N/A                                                                                                                                                                                                        | N/A                                                 |
| CoQ10 + Melatonin + Vitamin B + Vitamin D                 | 1 | Iran          | 80  | Anxiety and sleep disorder                                   | N/A                                                                                                                                                                                                        | N/A                                                 |
| Naturopathy + Yoga based lifestyle                        | 1 | India         | 80  | Anxiety, stress, and depression                              | N/A                                                                                                                                                                                                        | N/A                                                 |

**Table S8: Musculoskeletal System**

| Major intervention class and name                                     | Registered trials | Countries                                      | Estimated enrollment | Specific clinical use in the trial/s                | Mechanism of action*                                                                                                                        | Other general clinical uses                                         |
|-----------------------------------------------------------------------|-------------------|------------------------------------------------|----------------------|-----------------------------------------------------|---------------------------------------------------------------------------------------------------------------------------------------------|---------------------------------------------------------------------|
| <b>Rehabilitation</b>                                                 |                   |                                                |                      |                                                     |                                                                                                                                             |                                                                     |
| General rehabilitation including telerehabilitation and physiotherapy | 5                 | Brazil, France, Greece, Turkey, United Kingdom | 837                  | Muscle weakness                                     | N/A                                                                                                                                         | N/A                                                                 |
| Physical exercise                                                     | 5                 | Brazil, Egypt, Pakistan, Spain                 | 520                  | Muscle weakness, muscle flexibility, and sarcopenia | N/A                                                                                                                                         | N/A                                                                 |
| Low-load resistance training with blood flow restriction (LL-BFR)     | 1                 | Iran                                           | 18                   | Quadriceps function, strength, and thickness        | N/A                                                                                                                                         | Enhance the morphology and strength response in human muscle tissue |
| Yoga based rehabilitation                                             | 1                 | Turkey                                         | 85                   | Myalgia                                             | N/A                                                                                                                                         | N/A                                                                 |
| Proprioceptive Training                                               | 1                 | Brazil                                         | 20                   | Muscle weakness                                     | Use of somatosensory signals such as proprioceptive or tactile afferents in the absence of information from other modalities such as vision | Restore sensorimotor function                                       |
| <b>Psychotherapy</b>                                                  |                   |                                                |                      |                                                     |                                                                                                                                             |                                                                     |
| HUS internet therapy for bodily stress syndromes (iHUSbs)             | 1                 | Finland                                        | 360                  | Bodily stress syndromes and fibromyalgia            | N/A                                                                                                                                         | Different mental health conditions                                  |
| Amygdala and insula retaining program (AIR)                           | 1                 | Finland                                        | 360                  | Bodily stress syndromes and fibromyalgia            | N/A                                                                                                                                         | N/A                                                                 |
| <b>Ayurveda</b>                                                       |                   |                                                |                      |                                                     |                                                                                                                                             |                                                                     |
| Sahachradi yapan basti                                                | 1                 | India                                          | 60                   | Myalgia                                             | N/A                                                                                                                                         | N/A                                                                 |
| <b>Traditional Chinese Medicine (TCM)</b>                             |                   |                                                |                      |                                                     |                                                                                                                                             |                                                                     |
| Tai-Chi                                                               | 1                 | Egypt                                          | 60                   | Hand-grip strength                                  | N/A                                                                                                                                         | N/A                                                                 |
| <b>Other Interventions</b>                                            |                   |                                                |                      |                                                     |                                                                                                                                             |                                                                     |

|                                                                             |   |                |    |                          |                                                                                                                                                                                                                                                                                      |                                                 |
|-----------------------------------------------------------------------------|---|----------------|----|--------------------------|--------------------------------------------------------------------------------------------------------------------------------------------------------------------------------------------------------------------------------------------------------------------------------------|-------------------------------------------------|
| Electrical stimulation                                                      | 2 | United States  | 60 | Muscle pain and weakness | N/A                                                                                                                                                                                                                                                                                  | N/A                                             |
| AXA1125                                                                     | 1 | United Kingdom | 40 | Muscle weakness          | N/A                                                                                                                                                                                                                                                                                  | N/A                                             |
| Photobiomodulation                                                          | 1 | Brazil         | 32 | Muscle weakness          | Light therapy that induces a complex chain of physiological reactions in diseased and damaged tissues to accelerate wound healing and tissue regeneration, increase circulation, reduce acute inflammation, reduce acute and chronic pain, and help restore normal cellular function | Stimulate hair growth and decrease fat deposits |
| Resistive Capacitive Monopolar Radio Frequency at 448 kHz (INDIBA®) (RFMCR) | 1 | Spain          | 24 | Global muscle capacity   | Metabolic stimulation, increased vascularization, and oxygenation of directly affected tissues, effects of deep hyperthermia generated by the interaction of the current with the treated biological substrate, as well as the activation of tissue regeneration                     | Neurological and pneumological pathologies      |
| <b>Intervention Combinations</b>                                            |   |                |    |                          |                                                                                                                                                                                                                                                                                      |                                                 |
| Mestinon + Salbutamol                                                       | 1 | Denmark        | 84 | Muscle weakness          | N/A                                                                                                                                                                                                                                                                                  | N/A                                             |



### Table S9: Non-system Specific

| Major intervention class and name                                     | Registered trials | Countries                                                                                                                                    | Estimated enrollment | Specific clinical use in the trial/s                                           | Mechanism of action*                                                                                                                                                                                                         | Other general clinical uses |
|-----------------------------------------------------------------------|-------------------|----------------------------------------------------------------------------------------------------------------------------------------------|----------------------|--------------------------------------------------------------------------------|------------------------------------------------------------------------------------------------------------------------------------------------------------------------------------------------------------------------------|-----------------------------|
| <b>Rehabilitation</b>                                                 |                   |                                                                                                                                              |                      |                                                                                |                                                                                                                                                                                                                              |                             |
| Physical exercise                                                     | 25                | Austria, Brazil, Denmark, Germany, India, Iran, Pakistan, Poland, Saudi Arabia, Spain, Sweden, Taiwan, Turkey, United Kingdom, United States | 1668                 | PACS symptoms relief, general quality of life, and fatigue                     | N/A                                                                                                                                                                                                                          | N/A                         |
| General rehabilitation including telerehabilitation and physiotherapy | 22                | Australia, Brazil, Canada, China, France, Germany, Greece, Luxembourg, Iran, India, Italy Norway, Spain, Sweden                              | 1702                 | PACS symptoms relief, general quality of life, fatigue, and exercise tolerance | N/A                                                                                                                                                                                                                          | N/A                         |
| Respiratory muscle training (inspiratory ±expiratory)                 | 6                 | Brazil, India, Spain, Turkey                                                                                                                 | 218                  | General quality of life, fatigue, and exercise tolerance                       | N/A                                                                                                                                                                                                                          | N/A                         |
| Yoga based rehabilitation                                             | 2                 | India, Turkey                                                                                                                                | 245                  | General quality of life                                                        | N/A                                                                                                                                                                                                                          | N/A                         |
| Whole body vibration training                                         | 1                 | Turkey                                                                                                                                       | 60                   | Fatigue                                                                        | N/A                                                                                                                                                                                                                          | N/A                         |
| Rehabilitation robot (Luna by EGZOTech)                               | 1                 | Poland                                                                                                                                       | 80                   | Fatigue                                                                        | N/A                                                                                                                                                                                                                          | N/A                         |
| Virtual reality (VR) rehabilitation                                   | 2                 | Netherlands, Turkey                                                                                                                          | 111                  | Pain and quality of life                                                       | N/A                                                                                                                                                                                                                          | N/A                         |
| BREATHE                                                               | 1                 | Canada                                                                                                                                       | 36                   | PACS symptoms relief                                                           | Virtual, multidisciplinary, patient-centered self-management program that provides education on Breathing, Rest/recovery, Education, Activity management, Thinking/cognition, Healthy voice strategies, and Eating/nutrition | N/A                         |

|                                                                  |   |                |     |                                     |                                                                                                                                                                                                                                                                                                                  |                                                                                                 |
|------------------------------------------------------------------|---|----------------|-----|-------------------------------------|------------------------------------------------------------------------------------------------------------------------------------------------------------------------------------------------------------------------------------------------------------------------------------------------------------------|-------------------------------------------------------------------------------------------------|
| Breathing and chest mobilization exercises                       | 1 | India          | 40  | Fatigue                             | N/A                                                                                                                                                                                                                                                                                                              | Improve range of motion and boost muscle flexibility and strength                               |
| Counterweight-Plus/DIRECT diet weight management program         | 1 | United Kingdom | 200 | Fatigue and pain                    | Diet programs delivered by Counterweight Ltd. via an online platform with text chat, video, or telephone support. Individuals will be allocated a named "Counterweight Coach" for personal support for regular appointments and to moderate an online chat facility to enable peer support between participants. | N/A                                                                                             |
| Activity tracker and a bespoke mobile phone 'App'                | 1 | United Kingdom | 250 | General quality of life and malaise | N/A                                                                                                                                                                                                                                                                                                              | N/A                                                                                             |
| Online singing, breathing and wellbeing program (ENO Breathe)    | 1 | United Kingdom | 153 | PACS symptoms relief                | N/A                                                                                                                                                                                                                                                                                                              | N/A                                                                                             |
| Lymphatic drainage massage                                       | 1 | United Kingdom | 100 | Fatigue                             | N/A                                                                                                                                                                                                                                                                                                              | Lymphedema                                                                                      |
| Heart rate variability biofeedback                               | 1 | United Kingdom | 30  | Dysautonomia                        | Registration and visualization of the interrelation of heart rhythm and respiratory rate                                                                                                                                                                                                                         | N/A                                                                                             |
| Manual therapy (hand operated technique and breathing exercises) | 1 | India          | 54  | General quality of life             | Therapy using PNF and MET techniques along with breathing exercises                                                                                                                                                                                                                                              | N/A                                                                                             |
| Neurofeedback therapy                                            | 1 | Czech Republic | 10  | Fatigue                             | Regulate brain activity by biological feedback                                                                                                                                                                                                                                                                   | Learning, attention, memory, motor function, sleep disorders, and other neurological conditions |
| Long COVID optimal health program (LC-OHP)                       | 1 | United Kingdom | 60  | PACS symptoms relief                | Multidisciplinary collaborative therapy and self-efficacy intervention                                                                                                                                                                                                                                           | N/A                                                                                             |
| NexJ Connected Wellness                                          | 1 | Canada         | 152 | General quality of life             | N/A                                                                                                                                                                                                                                                                                                              | N/A                                                                                             |
| Slow-paced breathing                                             | 1 | India          | 100 | PACS symptoms relief                | N/A                                                                                                                                                                                                                                                                                                              | N/A                                                                                             |
| <b>Education</b>                                                 |   |                |     |                                     |                                                                                                                                                                                                                                                                                                                  |                                                                                                 |
| Pain and self-management education                               | 1 | Spain          | 40  | General quality of life and pain    | N/A                                                                                                                                                                                                                                                                                                              | N/A                                                                                             |
| Medical psychoeducational talks                                  | 1 | Germany        | 26  | Fatigue                             | N/A                                                                                                                                                                                                                                                                                                              | N/A                                                                                             |
| Education and Strategies Intervention                            | 1 | Canada         | 270 | General quality of life             | N/A                                                                                                                                                                                                                                                                                                              | N/A                                                                                             |

**Leukotriene receptor antagonists**

|                                                                           |   |                       |      |                                     |                                                                                                                                                                                     |                                                                                           |
|---------------------------------------------------------------------------|---|-----------------------|------|-------------------------------------|-------------------------------------------------------------------------------------------------------------------------------------------------------------------------------------|-------------------------------------------------------------------------------------------|
| Ibudilast                                                                 | 1 | Canada                | 1000 | PACS symptoms relief                | Anti-inflammatory effects, such as phosphodiesterase inhibition, and neuroprotective effects, such as inhibition of nitric oxide synthesis and reduction in reactive oxygen species | Multiple sclerosis, asthma, and cerebrovascular disease.                                  |
| <b>Antihistamines for systemic use</b>                                    |   |                       |      |                                     |                                                                                                                                                                                     |                                                                                           |
| Loratadine                                                                | 1 | India                 | 64   | PACS symptoms relief                | H1 histamine receptors antagonists                                                                                                                                                  | Allergic rhinitis, wheal formation, urticaria, and other allergic dermatologic conditions |
| <b>Nucleosides and Nucleotides excl. Reverse Transcriptase Inhibitors</b> |   |                       |      |                                     |                                                                                                                                                                                     |                                                                                           |
| Remdesivir                                                                | 1 | Finland               | 202  | General quality of life             | Nucleoside analog used to inhibit the action of RNA polymerase                                                                                                                      | Acute COVID-19                                                                            |
| <b>Purine Derivatives</b>                                                 |   |                       |      |                                     |                                                                                                                                                                                     |                                                                                           |
| Pentoxifylline                                                            | 1 | Canada                | 1000 | PACS symptoms relief                | Synthetic dimethylxanthine derivative that modulates the rheological properties of blood and has both anti-oxidant and anti-inflammatory properties                                 | Intermittent claudication in patients with chronic occlusive arterial disease             |
| <b>Direct factor Xa inhibitors</b>                                        |   |                       |      |                                     |                                                                                                                                                                                     |                                                                                           |
| Apixaban                                                                  | 1 | United Kingdom        | 2631 | Improve mortality                   | Selectively inhibits factor Xa in its free and bound forms and inhibits prothrominase                                                                                               | Reducing the risk of stroke and systemic embolism                                         |
| Rivaroxaban                                                               | 1 | United Kingdom        | 4520 | Fatigue and PACS symptoms relief    | Selectively inhibits factor Xa in its free and bound forms                                                                                                                          | Prevention of venous thromboembolic events                                                |
| <b>Blood and related products</b>                                         |   |                       |      |                                     |                                                                                                                                                                                     |                                                                                           |
| Plasma Exchange                                                           | 1 | Spain                 | 50   | Fatigue and general quality of life | Removes 65% to 70% of the disease-causing proteins (antibodies) in the plasma                                                                                                       | Various autoimmune diseases                                                               |
| <b>HMG CoA Reductase Inhibitors</b>                                       |   |                       |      |                                     |                                                                                                                                                                                     |                                                                                           |
| Atorvastatin                                                              | 1 | United Kingdom        | 2631 | Improve mortality                   | Competitive inhibitor of the enzyme HMG-CoA (3-hydroxy-3-methylglutaryl coenzyme A) reductase                                                                                       | Dyslipidemias                                                                             |
| <b>Drugs used in alcohol dependence (Opioid Receptor Antagonist)</b>      |   |                       |      |                                     |                                                                                                                                                                                     |                                                                                           |
| Naltrexone                                                                | 1 | Canada, United States | 160  | Fatigue and general quality of life | Pure opiate antagonist and has little or no agonist activity                                                                                                                        | Maintenance of opiate cessation and management of alcohol dependence                      |
| <b>Psychotherapy</b>                                                      |   |                       |      |                                     |                                                                                                                                                                                     |                                                                                           |
| Mind body syndrome therapy                                                | 1 | United States         | 22   | Multiple somatic complaints         | N/A                                                                                                                                                                                 | N/A                                                                                       |
| Mindfulness-based therapy                                                 | 1 | Germany               | 118  | Fatigue                             | N/A                                                                                                                                                                                 | N/A                                                                                       |

|                                                          |   |                    |      |                                     |                                                                                                                                                        |                                                                                                                                                                                                                                                                                                                                                                        |
|----------------------------------------------------------|---|--------------------|------|-------------------------------------|--------------------------------------------------------------------------------------------------------------------------------------------------------|------------------------------------------------------------------------------------------------------------------------------------------------------------------------------------------------------------------------------------------------------------------------------------------------------------------------------------------------------------------------|
| Cognitive behavioral therapy (CBT)                       | 2 | Netherlands, Spain | 154  | General pain and fatigue            | N/A                                                                                                                                                    | Different mental health conditions                                                                                                                                                                                                                                                                                                                                     |
| PACS Coping and Recovery (PACS-CR) Intervention          | 1 | United States      | 36   | PACS symptoms relief                | Improve psychological adjustment to PACS symptoms, promote resiliency, and facilitate coping                                                           | N/A                                                                                                                                                                                                                                                                                                                                                                    |
| LISTEN intervention                                      | 1 | United Kingdom     | 558  | PACS symptoms relief                | N/A                                                                                                                                                    | N/A                                                                                                                                                                                                                                                                                                                                                                    |
| Adhera® Digital Health Intervention                      | 1 | Spain              | 15   | Fatigue                             | Digital program that includes personalized patient education and support, monitoring using psychometrics and wearables, and mental wellbeing exercises | N/A                                                                                                                                                                                                                                                                                                                                                                    |
| <b>Antianemic Preparations</b>                           |   |                    |      |                                     |                                                                                                                                                        |                                                                                                                                                                                                                                                                                                                                                                        |
| Erythropoietin                                           | 1 | Cuba               | 135  | Multiple organ systems              | Recombinant form of human erythropoietin used to increase differentiation of progenitor cells to red blood cells                                       | Anemia due to multiple causes                                                                                                                                                                                                                                                                                                                                          |
| <b>Anti-gout</b>                                         |   |                    |      |                                     |                                                                                                                                                        |                                                                                                                                                                                                                                                                                                                                                                        |
| Colchicine                                               | 1 | United Kingdom     | 4520 | Fatigue and PACS symptoms relief    | Disrupts cytoskeletal functions through inhibition of $\beta$ -tubulin polymerization into microtubules                                                | Gout and Familial Mediterranean Fever                                                                                                                                                                                                                                                                                                                                  |
| <b>Pituitary and hypothalamic hormones and analogues</b> |   |                    |      |                                     |                                                                                                                                                        |                                                                                                                                                                                                                                                                                                                                                                        |
| Somatropin                                               | 1 | United States      | 83   | Fatigue and general quality of life | Growth hormone and prolactin receptors ligand and promotes production of insulin-like growth factor-1 (IGF-1)                                          | Pediatric patients who have growth failure due to an inadequate secretion of endogenous growth hormone or syndromic short stature. Also, adults with adult-onset growth hormone deficiency, either alone or associated with multiple hormone deficiencies (hypopituitarism), because of pituitary disease, hypothalamic disease, surgery, radiation therapy, or trauma |
| <b>Antithrombotic agents</b>                             |   |                    |      |                                     |                                                                                                                                                        |                                                                                                                                                                                                                                                                                                                                                                        |
| Sulodexide                                               | 1 | Russian Federation | 30   | Endothelial dysfunction             | Thrombin inhibition produced and antithrombin-III catalysis by fast moving heparin (FMH).                                                              | Chronic venous ulcers in the legs                                                                                                                                                                                                                                                                                                                                      |
| <b>Psychostimulants</b>                                  |   |                    |      |                                     |                                                                                                                                                        |                                                                                                                                                                                                                                                                                                                                                                        |
| Caffeine                                                 | 1 | Brazil             | 34   | PACS symptoms relief                | Adenosine A1 receptor antagonism                                                                                                                       | Apnea of prematurity in infants                                                                                                                                                                                                                                                                                                                                        |

**Ayurveda**

|                        |   |                       |      |                                                               |     |     |
|------------------------|---|-----------------------|------|---------------------------------------------------------------|-----|-----|
| Aarogyam               | 1 | India                 | 150  | General quality of life                                       | N/A | N/A |
| Cardamom extract       | 1 | India                 | 100  | PACS symptoms relief                                          | N/A | N/A |
| Ashwagandha            | 5 | India, United Kingdom | 2764 | General quality of life, fatigue, and male sexual dysfunction | N/A | N/A |
| Amalaki Rasayan        | 1 | India                 | 15   | PACS symptoms relief                                          | N/A | N/A |
| Shwadanshtradi Rasayan | 1 | India                 | 35   | PACS symptoms relief                                          | N/A | N/A |
| Bhargyadi Taila Nasya  | 1 | India                 | 24   | PACS symptoms relief                                          | N/A | N/A |
| Rasa Pacahna Kwath     | 1 | India                 | 24   | PACS symptoms relief                                          | N/A | N/A |
| Guduchi Ghana Vati     | 1 | India                 | 24   | PACS symptoms relief                                          | N/A | N/A |
| ProGenX                | 1 | India                 | 200  | Fatigue                                                       | N/A | N/A |
| Virecana karma         | 2 | India                 | 122  | PACS symptoms relief                                          | N/A | N/A |
| Panchamutti kanji      | 1 | India                 | 10   | Fatigue                                                       | N/A | N/A |
| Bharangi Guda          | 1 | India                 | 30   | Fatigue and weight loss                                       | N/A | N/A |
| Sahachradi yapan basti | 1 | India                 | 60   | Fatigue                                                       | N/A | N/A |
| Aoim-Z tablets         | 1 | India                 | 30   | General quality of life                                       | N/A | N/A |
| Nellikai legiyam       | 1 | India                 | 1409 | PACS symptoms relief                                          | N/A | N/A |

|                                                                                  |   |                        |      |                                  |                   |                                                   |
|----------------------------------------------------------------------------------|---|------------------------|------|----------------------------------|-------------------|---------------------------------------------------|
| Amukkura chooranam                                                               | 1 | India                  | 1409 | PACS symptoms relief             | N/A               | N/A                                               |
| <b>Traditional Chinese Medicine (TCM)</b>                                        |   |                        |      |                                  |                   |                                                   |
| Traditional Chinese medicine decoction                                           | 1 | China                  | 34   | Fatigue                          | N/A               | N/A                                               |
| Gu-Shen Ding-Chuan-Wan                                                           | 1 | China                  | 144  | Fatigue                          | N/A               | N/A                                               |
| Jiexingjunzi granules                                                            | 1 | China                  | 100  | PACS symptoms relief             | N/A               | N/A                                               |
| Qibei Fuzheng granules                                                           | 1 | China                  | 100  | PACS symptoms relief             | N/A               | N/A                                               |
| Tricholoma matsutake                                                             | 1 | China                  | 100  | Physical wellbeing               | N/A               | N/A                                               |
| Dendrobium candidum                                                              | 1 | China                  | 100  | Physical wellbeing               | N/A               | N/A                                               |
| Cannabis sativa capsule                                                          | 1 | China                  | 100  | Physical wellbeing               | N/A               | N/A                                               |
| Acupuncture                                                                      | 2 | Brazil, United Kingdom | 210  | PACS symptoms relief and fatigue | N/A               | N/A                                               |
| Laser acupuncture                                                                | 1 | Egypt                  | 80   | PACS symptoms relief and fatigue | N/A               | N/A                                               |
| Tai-Chi                                                                          | 1 | Egypt                  | 60   | PACS symptoms relief             | N/A               | N/A                                               |
| <b>Other Interventions</b>                                                       |   |                        |      |                                  |                   |                                                   |
| Prospekta                                                                        | 1 | Russian federation     | 680  | Asthenia                         | N/A               | N/A                                               |
| AXA1125                                                                          | 1 | United Kingdom         | 40   | Muscle weakness                  | N/A               | N/A                                               |
| Curcumin/Boswellia Serrata/Ascorbic acid mixture                                 | 1 | Australia              | 32   | PACS symptoms relief             | N/A               | N/A                                               |
| IMMUNODAAT™ Botanical Ingredient                                                 | 1 | India                  | 60   | PACS symptoms relief             | N/A               | N/A                                               |
| Omega-3 (Eicosapentaenoic acid - EPA + docosahexaenoic acid - DHA)               | 1 | United States          | 100  | PACS symptoms relief             | N/A               | N/A                                               |
| ImmunoSEB + ProbioSEB CSC3                                                       | 1 | India                  | 200  | Fatigue                          | Probiotic complex | N/A                                               |
| Nutraceuticals                                                                   | 1 | Australia              | 60   | PACS symptoms relief             | N/A               | N/A                                               |
| Hope Biosciences adipose-derived mesenchymal stem cells – allogeneic (HB-adMSCs) | 1 | United States          | 80   | Fatigue                          | N/A               | Autoimmune diseases, including multiple sclerosis |

|                                                          |   |                               |     |                                |                                                                                                                                                                                                                                                            |                                                                                                                                                      |
|----------------------------------------------------------|---|-------------------------------|-----|--------------------------------|------------------------------------------------------------------------------------------------------------------------------------------------------------------------------------------------------------------------------------------------------------|------------------------------------------------------------------------------------------------------------------------------------------------------|
| Personalized multidisciplinary day-hospital intervention | 1 | France                        | 130 | PACS symptoms relief           | N/A                                                                                                                                                                                                                                                        | N/A                                                                                                                                                  |
| Echinochrome A                                           | 1 | Argentina                     | 60  | PACS symptoms relief           | An antioxidant diminishes ROS in the cells, enhance glutathion pathways and diminish cellular inflammation                                                                                                                                                 |                                                                                                                                                      |
| High tone power therapy                                  | 1 | Egypt                         | 56  | Fatigue and exercise tolerance | N/A                                                                                                                                                                                                                                                        | N/A                                                                                                                                                  |
| Immulina™ (Spirulina)                                    | 1 | United States                 | 120 | PACS symptoms relief           | Immunopotentialion                                                                                                                                                                                                                                         | N/A                                                                                                                                                  |
| Lactobacillus Plantarum 299v in fermented oat drink      | 1 | United States                 | 80  | Endothelial dysfunction        | Probiotic that reduces circulating levels of cell-free mitochondrial DNA (cf-mtDNA), decreases toll-like receptor 9 (TLR9) activation [and downstream interleukin (IL-6)], and improves micro- and macrovascular (brachial artery) endothelial dysfunction | N/A                                                                                                                                                  |
| Zofin (formerly Organiceell Flow)                        | 1 | United States                 | 30  | PACS symptoms relief           | Contains exosomes carrying several miRNAs that are involved in the promotion of immune regulation and response and miRNAs that target ACE2                                                                                                                 | Acute COVID-19                                                                                                                                       |
| Transcutaneous auricular vagus nerve stimulation (TENS)  | 2 | United Kingdom, United States | 116 | Fatigue                        | Selectively activate large diameter non-noxious afferents (A-beta) to reduce nociceptor cell activity and sensitization at a segmental level in the central nervous system                                                                                 | Peripheral neuropathy and fibromyalgia. It also effectively improves lower-extremity perfusion and oxygen delivery in patients with ischemic lesions |
| BlaQmax ®                                                | 1 | India                         | 70  | PACS symptoms relief           | acetylcholinesterase inhibition property, reduced sleep latency and improved both duration of deep sleep and sleep quality                                                                                                                                 | Anxiety, stress, and sleep disorders                                                                                                                 |
| Cold knee casts                                          | 1 | Germany                       | 60  | Fatigue                        | N/A                                                                                                                                                                                                                                                        | N/A                                                                                                                                                  |
| Xltran Plus™ or Xltran™                                  | 1 | United States                 | 111 | PACS symptoms relief           | Full cannabis flower formulation, rich in cannabinoids and terpenes formulation                                                                                                                                                                            | N/A                                                                                                                                                  |
| TNX-102                                                  | 1 | United States                 | 470 | General pain                   | Potent binding and antagonist activities at the serotonin2A, α1-adrenergic, histaminergic-H1, and muscarinic-M1 receptors                                                                                                                                  | Centrally acting analgesic that helps in relieving pain by improving sleep                                                                           |
| Hydrogen-Oxygen Generator with nebulizer                 | 1 | China                         | 216 | General quality of life        | N/A                                                                                                                                                                                                                                                        | N/A                                                                                                                                                  |
| Niagen (Vitamin B3)                                      | 1 | United States                 | 100 | General physical health        | Increase NAD+ (nicotinamide adenine dinucleotide) level, a vital coenzyme naturally produced in the body, that                                                                                                                                             | Cardiovascular, neurodegenerative, and metabolic disorders                                                                                           |

|                                         |   |                      |     |                                     |                                                                                                                                                                                                                                                                                      |                                                  |
|-----------------------------------------|---|----------------------|-----|-------------------------------------|--------------------------------------------------------------------------------------------------------------------------------------------------------------------------------------------------------------------------------------------------------------------------------------|--------------------------------------------------|
|                                         |   |                      |     |                                     | promotes cellular defense, resilience, and repair                                                                                                                                                                                                                                    |                                                  |
| Photobiomodulation                      | 1 | Egypt                | 100 | Fatigue                             | Light therapy that induces a complex chain of physiological reactions in diseased and damaged tissues to accelerate wound healing and tissue regeneration, increase circulation, reduce acute inflammation, reduce acute and chronic pain, and help restore normal cellular function | Stimulate hair growth and decrease fat deposits  |
| Cracie Bojungiki-tang extract           | 1 | Republic of Korea    | 45  | Fatigue                             | N/A                                                                                                                                                                                                                                                                                  | N/A                                              |
| Gyeongbang Gyeongok-go                  | 1 | Republic of Korea    | 45  | Fatigue                             | N/A                                                                                                                                                                                                                                                                                  | N/A                                              |
| Hanpoong Soonsimhwan                    | 1 | Republic of Korea    | 45  | Fatigue                             | N/A                                                                                                                                                                                                                                                                                  | N/A                                              |
| ADAPT-232                               | 1 | Georgia              | 100 | Fatigue and general quality of life | N/A                                                                                                                                                                                                                                                                                  | N/A                                              |
| Targeted Wellness Formula C™            | 1 | United States        | 60  | General quality of life             | N/A                                                                                                                                                                                                                                                                                  | N/A                                              |
| Individualized homeopathic treatments   | 3 | India, United States | 182 | Fatigue and PACS symptoms relief    | N/A                                                                                                                                                                                                                                                                                  | N/A                                              |
| 5-aminolevulinic acid phosphate (5-ALA) | 1 | Japan                | 42  | Fatigue and general quality of life | A natural delta amino acid critical component in the body's synthesis of heme, a major component of hemoglobin and myoglobin and also an essential component of cytochromes and therefore a critical component of the energy generating function of mitochondria                     | N/A                                              |
| Coenzyme-Q10                            | 1 | Denmark              | 120 | PACS symptoms relief                | N/A                                                                                                                                                                                                                                                                                  | N/A                                              |
| Bioarginin C                            | 1 | Italy                | 50  | Fatigue                             | Supplementation of L-arginine and vitamin C                                                                                                                                                                                                                                          | N/A                                              |
| Hyperbaric oxygen                       | 1 | Sweden               | 80  | General quality of life             | Improve pulmonary gas exchange by restoring hypoxic pulmonary vasoconstriction                                                                                                                                                                                                       | N/A                                              |
| Lactoferrin                             | 1 | Netherlands          | 72  | Fatigue                             | Iron-binding protein with immunological properties, and is both antibacterial and antiviral                                                                                                                                                                                          | Reduces the risk of respiratory tract infections |
| Anhydrous enol-oxaloacetate             | 1 | United States        | 40  | Fatigue                             | A small molecule blood glutamate scavenger, that can be used to lower glutamate plasma levels, and has potential neuroprotective activity                                                                                                                                            | Traumatic brain injury                           |



|                                                                                 |   |                                              |      |                                                  |                                                                                                                   |                                                                                                                                     |
|---------------------------------------------------------------------------------|---|----------------------------------------------|------|--------------------------------------------------|-------------------------------------------------------------------------------------------------------------------|-------------------------------------------------------------------------------------------------------------------------------------|
| Bone marrow mesenchymal stem cell derived extracellular vesicles                | 1 | United States                                | 60   | Morbidity                                        |                                                                                                                   |                                                                                                                                     |
| Ruconest                                                                        | 1 | United States                                | 40   | Fatigue                                          | C1 Esterase Inhibitor (recombinant) regulating the activation of the complement and contact system pathway        | Hereditary angioedema                                                                                                               |
| Transcranial direct current stimulation (tDCS)                                  | 6 | Brazil, Czech Republic, Spain, United States | 211  | Fatigue and generalized body pain                | Causing the neuron's resting membrane potential to depolarize or hyperpolarize                                    | Neuropsychiatric conditions such as depression, anxiety, Parkinson's disease, and chronic pain                                      |
| Sodium pyruvate nasal spray (EmphyCorp, N115)                                   | 1 | United States                                | 22   | PACS symptoms relief                             | Reduced nasal and lung inflammation and congestion by reducing inflammatory cytokines including the IL-6 cytokine | Chronic obstructive pulmonary disease, pulmonary fibrosis, cystic fibrosis, allergic rhinitis, chronic rhinitis, sinusitis, and flu |
| RSLV-132                                                                        | 1 | United States                                | 70   | Fatigue                                          | RNase-Fc fusion protein designed to remove RNA, a pro-inflammatory nucleic acid                                   | Lupus and Sjögren's syndrome                                                                                                        |
| Leronlimab                                                                      | 1 | United States                                | 56   | General quality of life and PACS symptoms relief | Reduction in the cytokine storm, particularly IL-6, as well as a normalization of the CD4/CD8 T-cell ratio.       | Number of cancers and HIV                                                                                                           |
| <b>Intervention Combinations</b>                                                |   |                                              |      |                                                  |                                                                                                                   |                                                                                                                                     |
| Mountain spa rehabilitation + Ubiquinol (reduced coenzyme Q10) supplementation  | 1 | Slovakia                                     | 51   | Accelerate recovery of patients with PACS        | N/A                                                                                                               | N/A                                                                                                                                 |
| Basti + Rasayana                                                                | 1 | India                                        | 24   | PACS symptoms relief                             | N/A                                                                                                               | N/A                                                                                                                                 |
| LiuJunzhi Decoction (LJZD) + Shashen Maidong Decoction (SSMDD)                  | 1 | Hong Kong                                    | 68   | Fatigue                                          | N/A                                                                                                               | N/A                                                                                                                                 |
| Chatushashti Prahari Pippali + Rehabilitation                                   | 1 | India                                        | 80   | General quality of life and PACS symptoms relief | N/A                                                                                                               | N/A                                                                                                                                 |
| Vardhamana pippali rasayana + Rehabilitation                                    | 1 | India                                        | 80   | General quality of life and PACS symptoms relief | N/A                                                                                                               | N/A                                                                                                                                 |
| Loratadine + Famotidine                                                         | 1 | United Kingdom                               | 4520 | Fatigue and PACS symptoms relief                 | N/A                                                                                                               | N/A                                                                                                                                 |
| Mitoquinone + Exercise                                                          | 1 | United States                                | 100  | PACS symptoms relief                             | N/A                                                                                                               | N/A                                                                                                                                 |
| Rajyoga + Yoga based rehabilitation                                             | 1 | India                                        | 500  | General quality of life                          | N/A                                                                                                               | N/A                                                                                                                                 |
| Vitamin K2 (MK-7) + Vitamin D3                                                  | 1 | United States                                | 150  | General quality of life and PACS symptoms relief | N/A                                                                                                               | N/A                                                                                                                                 |
| NAC (N-acetyl cysteine) + Alpha lipoic acid (ALA) + liposomal glutathione (GSH) | 1 | United State                                 | 50   | General quality of life and PACS symptoms relief | N/A                                                                                                               | N/A                                                                                                                                 |

|                                                                                     |   |               |     |                                                  |     |     |
|-------------------------------------------------------------------------------------|---|---------------|-----|--------------------------------------------------|-----|-----|
| Self- applied acupressure + Qigong course + advice literature                       | 1 | Germany       | 200 | Fatigue                                          | N/A | N/A |
| Individualized nutrition therapy + Patient-tailored physical rehabilitation program | 1 | Belgium       | 66  | PACS symptoms relief                             | N/A | N/A |
| Naturopathy + Yoga based rehabilitation                                             | 2 | India         | 226 | General quality of life and PACS symptoms relief | N/A | N/A |
| Biometric shirt+ Exercise program                                                   | 1 | Canada        | 20  | Fatigue and general quality of life              | N/A | N/A |
| CoQ10 + Melatonin + Vitamin B+ Vitamin D                                            | 1 | Iran          | 80  | Fatigue                                          | N/A | N/A |
| Naltrexone + Nicotinamide adenine dinucleotide (NAD+)                               | 1 | United States | 60  | Fatigue and general quality of life              | N/A | N/A |
| Osteopathic manipulative treatment + Physiotherapy                                  | 1 | Brazil        | 104 | Fatigue and functional status                    | N/A | N/A |
